# Supplementary material for: Palladium-catalyzed oxidative cross-coupling for the synthesis of α-amino ketones
Source: Royal Society of Chemistry journal article supplement (doi:10.1039/c9ra06108h), 2019-01-01

## Supporting Information

# Palladium-Catalyzed Oxidative Cross-Coupling for Synthesis of $\alpha$ -Amino Ketones

Xiao-Hong Wei,\* Zhen-Hua Li,\* Lian-Biao Zhao, Ping Zhang, Han-Cheng Zhou and  
Yan-Bin Wang

Key Laboratory for Utility of Environment-Friendly Composite Materials and  
Biomass in University of Gansu Province, College of Chemical Engineering,  
Northwest Minzu University, Lanzhou 730030, P. R. China.

E-mail: [weixh12@lzu.edu.cn](mailto:weixh12@lzu.edu.cn), [lizhh02006@163.com](mailto:lizhh02006@163.com)

## Contents

|                                                                   |     |
|-------------------------------------------------------------------|-----|
| General .....                                                     | S2  |
| Experimental Section .....                                        | S2  |
| 1. General procedure for synthesis of 2a-2z.....                  | S3  |
| 2. Synthesis of T <sup>+</sup> BF <sub>4</sub> <sup>-</sup> ..... | S3  |
| 3. Analytical Data of Products .....                              | S3  |
| Key intermediate A was detected by GC-MS .....                    | S12 |
| <sup>1</sup> H and <sup>13</sup> C NMR spectra of Products.....   | S12 |

## General

All reactions involving air- or moisture-sensitive reagents were carried out under an argon atmosphere. All solvents were distilled under Ar before use. All chemicals were purchased from Aldrich and J&K Chemical and used without further purification. Thin-layer chromatography (TLC) was performed using 60 mesh silica gel plates visualized with short-wavelength UV light (254 nm). Silica gel 60 (230 - 400 mesh) was used for column chromatography.  $^1\text{H}$  and  $^{13}\text{C}$  NMR spectra were recorded using  $\text{CDCl}_3$  solvent on a Bruker advance III 400 spectrometer (400 MHz for  $^1\text{H}$  and 101 MHz for  $^{13}\text{C}$ ) or on a Varian OXFORD 300 spectrometer (300 MHz for  $^1\text{H}$  and 75.75 MHz for  $^{13}\text{C}$ ). The chemical shift is given in dimensionless  $\delta$  values and is frequency referenced relative to TMS in  $^1\text{H}$  and  $^{13}\text{C}$  NMR spectroscopy.

## Experimental Section

### 1. General procedure for synthesis of 2a-2z

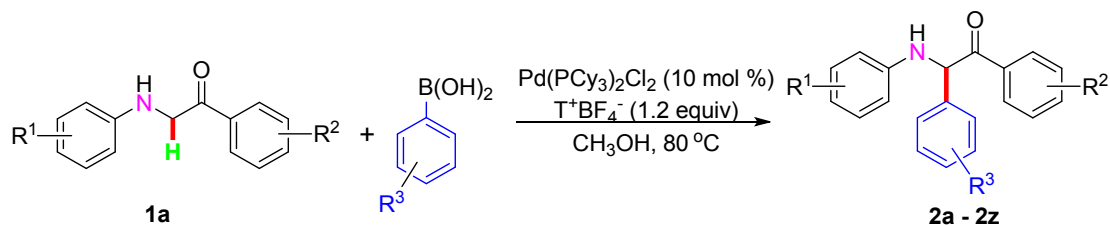

An oven-dried 10 mL screw-capped vial containing **1a** (0.1 mmol, 1.0 equiv), phenyl boric acid (0.12 mmol, 1.2 equiv),  $\text{Pd}(\text{PCy}_3)_2\text{Cl}_2$  (0.01 mmol, 0.1 equiv), 2,6,6-tetramethylpiperidine-1-oxoammonium *tetra*-fluoroborate ( $\text{T}^+\text{BF}_4^-$ ) (0.12 mmol, 1.2 equiv), and purged with Ar three times. Then,  $\text{CH}_3\text{OH}$  (1 mL) was added *via* syringe, and heated to  $80^\circ\text{C}$  in an oil bath until the starting material has disappeared for 20 hours (monitored by TLC). And then the solvent was removed in vacuo and residue was purified on a silica gel column using EA/PE as eluent to afford the desired product **2a**.

### 2. Synthesis of $\text{T}^+\text{BF}_4^-$

In a 250 mL round bottom flask, an aqueous solution of  $\text{HBF}_4$  (48% aqueous

solution, 10.9 mL, 83.2 mmol) was added to the heterogeneous solution of **1** (11.367g, 72.8 mmol) in purified water (31.15 mL). The reaction mixture was stirred at room temperature for 30 min to give a yellow orange mixture. In ice bath, an aqueous solution of NaOCl (5% aqueous solution, 48.5mL, 35.7 mmol) was added to the solution for 2 h. The mixture is filtered with grass filter and the yellow solid was washed with cooled water (4 °C, 4 × 20 mL) and dichloromethane (3 × 30 mL). After dried under high vacuum at room temperature overnight, the product is obtained as a bright yellow solid.

### 3. Analytical Data of Products

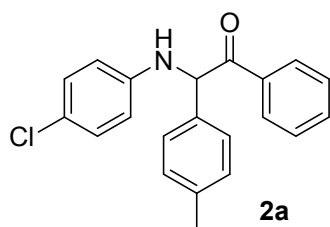

Yellow solid,  $^1\text{H NMR}$  (400 MHz,  $\text{CDCl}_3$ )  $\delta$  7.99 (d,  $J = 7.2$  Hz, 2H), 7.53 (t,  $J = 6.8$  Hz, 1H), 7.42 (t,  $J = 7.6$  Hz, 2H), 7.30 (d,  $J = 8.1$  Hz, 2H), 7.12 – 7.00 (m, 4H), 6.57 (d,  $J = 8.8$  Hz, 2H), 5.94 (d,  $J = 6.4$  Hz, 1H), 5.44 (d,  $J = 6.4$  Hz, 1H), 2.24 (s, 3H).  $^{13}\text{C NMR}$  (101 MHz,  $\text{CDCl}_3$ )  $\delta$  196.58, 144.55, 138.06, 134.74, 134.05, 133.56, 129.82, 128.99, 128.83, 128.65, 127.93, 122.20, 114.50, 62.25, 21.06. **MS (ESI):** found  $[\text{M}+\text{H}]^+$  336.2.

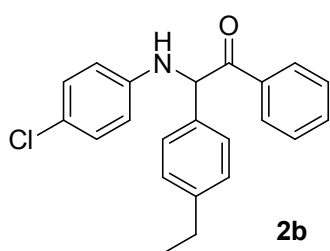

Yellow solid,  $^1\text{H NMR}$  (300 MHz,  $\text{CDCl}_3$ )  $\delta$  8.00 (d,  $J = 8.0$  Hz, 2H), 7.54 (t,  $J = 7.8$  Hz, 1H), 7.43 (t,  $J = 7.7$  Hz, 2H), 7.33 (d,  $J = 8.0$  Hz, 2H), 7.08 (dd,  $J = 14.6, 8.3$  Hz, 4H), 6.57 (d,  $J = 8.6$  Hz, 2H), 5.95 (d,  $J = 6.7$  Hz, 1H), 5.43 (d,  $J = 6.7$  Hz, 1H), 2.55 (q,  $J = 7.6$  Hz, 2H), 1.15 (t,  $J = 7.6$  Hz, 3H).  $^{13}\text{C NMR}$  (75 MHz,  $\text{CDCl}_3$ )  $\delta$  196.60, 144.60, 144.27, 134.21, 133.57, 129.00, 128.86, 128.66, 128.62, 127.95, 114.47, 62.24, 29.66, 28.37, 15.15. **MS (ESI):** found  $[\text{M}+\text{H}]^+$  366.1.

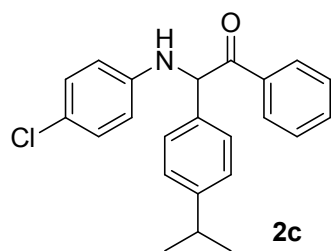

Yellow solid,  $^1\text{H NMR}$  (300 MHz,  $\text{CDCl}_3$ )  $\delta$  8.02 (d,  $J = 8.6$  Hz, 2H), 7.55 (t,  $J = 7.4$  Hz, 1H), 7.44 (t,  $J = 7.4$  Hz, 2H), 7.34 (d,  $J = 8.2$  Hz, 2H), 7.14 (d,  $J = 6.6$  Hz, 2H), 7.07 (d,  $J = 8.8$  Hz, 2H), 6.58 (d,  $J = 8.9$  Hz, 2H), 5.96 (d,  $J = 6.7$  Hz, 1H), 5.41 (d,  $J = 6.6$  Hz, 1H), 2.81 (dt,  $J = 13.8, 6.9$  Hz, 1H), 1.17 (d,  $J = 6.9$  Hz, 6H).  $^{13}\text{C NMR}$  (75 MHz,  $\text{CDCl}_3$ )  $\delta$  196.65, 148.86, 144.66, 134.77, 134.27, 133.60, 129.01, 128.90, 128.68, 127.91, 127.25, 122.18, 114.45, 62.21, 33.65, 23.76. **MS (ESI)**: found  $[\text{M}+\text{H}]^+$  363.4.

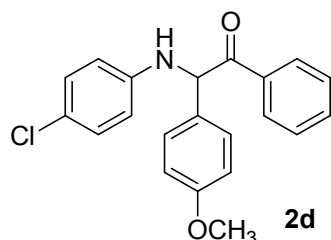

Yellow solid,  $^1\text{H NMR}$  (300 MHz,  $\text{CDCl}_3$ )  $\delta$  7.98 (d,  $J = 8.6$  Hz, 2H), 7.54 (t,  $J = 7.4$  Hz, 1H), 7.43 (t,  $J = 7.5$  Hz, 2H), 7.33 (d,  $J = 8.7$  Hz, 2H), 7.06 (d,  $J = 8.9$  Hz, 2H), 6.80 (d,  $J = 8.8$  Hz, 2H), 6.57 (d,  $J = 8.9$  Hz, 2H), 5.93 (d,  $J = 6.6$  Hz, 1H), 5.42 (d,  $J = 6.5$  Hz, 1H), 3.71 (s, 3H).  $^{13}\text{C NMR}$  (101 MHz,  $\text{CDCl}_3$ )  $\delta$  196.60, 159.30, 144.53, 134.76, 133.54, 129.23, 128.99, 128.90, 128.79, 128.67, 122.20, 114.51, 114.49, 61.86, 55.15. **MS (ESI)**: found  $[\text{M}+\text{H}]^+$  352.0.

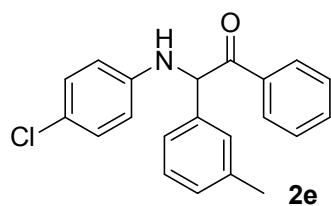

Yellow solid,  $^1\text{H NMR}$  (300 MHz,  $\text{CDCl}_3$ )  $\delta$  8.00 (d,  $J = 8.7$  Hz, 2H), 7.54 (t,  $J = 6.8$  Hz, 1H), 7.44 (t,  $J = 7.6$  Hz, 2H), 7.30 – 7.13 (m, 3H), 7.06 (t,  $J = 7.1$  Hz, 3H), 6.58 (d,  $J = 8.7$  Hz, 2H), 5.93 (d,  $J = 5.6$  Hz, 1H), 5.42 (d,  $J = 4.5$  Hz, 1H), 2.27 (s, 3H).  $^{13}\text{C NMR}$  (75 MHz,  $\text{CDCl}_3$ )  $\delta$  196.63, 144.61, 138.94, 137.02, 134.71, 133.63, 129.10, 129.02, 128.90, 128.86, 128.68, 128.40, 125.38, 122.25, 114.49, 62.57, 21.43. **MS (ESI)**: found  $[\text{M}+\text{H}]^+$  336.2.

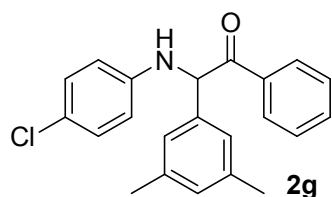

Yellow solid,  $^1\text{H NMR}$  (300 MHz,  $\text{CDCl}_3$ )  $\delta$  8.01 (d,  $J = 7.2$  Hz, 2H), 7.54 (t,  $J = 6.7$  Hz, 1H), 7.44 (t,  $J = 7.5$  Hz, 2H), 7.13 – 6.97 (m, 4H), 6.84 (s, 1H), 6.58 (d,  $J = 8.8$  Hz, 2H), 5.89 (d,  $J = 6.8$  Hz, 1H), 5.35 (d,  $J = 6.8$  Hz, 1H), 2.24 (s, 6H).  $^{13}\text{C NMR}$  (75 MHz,  $\text{CDCl}_3$ )  $\delta$  196.72, 144.74, 138.70, 136.93, 134.74, 133.58, 130.07, 129.01, 128.86, 128.66, 125.78, 122.21, 114.47, 62.60, 21.30. **MS (ESI)**: found  $[\text{M}+\text{H}]^+$  349.7.

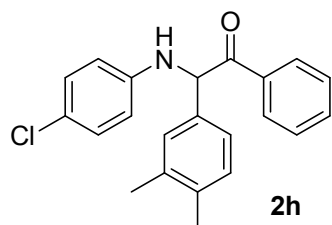

Yellow solid,  $^1\text{H NMR}$  (300 MHz,  $\text{CDCl}_3$ )  $\delta$  8.01 (d,  $J = 7.2$  Hz, 2H), 7.59 – 7.48 (m, 1H), 7.43 (t,  $J = 7.5$  Hz, 2H), 7.16 (d,  $J = 8.6$  Hz, 2H), 7.05 (t,  $J = 6.8$  Hz, 3H), 6.58 (d,  $J = 8.8$  Hz, 2H), 5.91 (d,  $J = 6.5$  Hz, 1H), 5.40 (d,  $J = 6.7$  Hz, 1H), 2.17 (s, 3H), 2.15 (s, 3H).  $^{13}\text{C NMR}$  (101 MHz,  $\text{CDCl}_3$ )  $\delta$  196.63, 144.67, 137.54, 136.82, 134.74, 134.38, 133.54, 130.23, 128.99, 128.87, 128.64, 125.72, 122.15, 114.47, 62.30, 29.68, 19.88, 19.45. **MS (ESI)**: found  $[\text{M}+\text{H}]^+$  349.7.

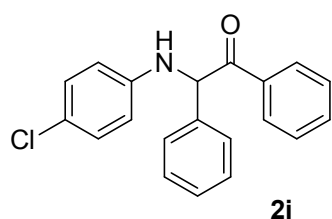

Yellow solid,  $^1\text{H NMR}$  (400 MHz,  $\text{CDCl}_3$ )  $\delta$  7.99 (d,  $J = 7.2$  Hz, 2H), 7.54 (t,  $J = 7.4$  Hz, 1H), 7.47 – 7.38 (m, 4H), 7.28 (t,  $J = 7.4$  Hz, 3H), 7.21 (t,  $J = 7.3$  Hz, 1H), 7.06 (d,  $J = 8.9$  Hz, 2H), 6.58 (d,  $J = 8.9$  Hz, 2H), 5.97 (d,  $J = 6.6$  Hz, 1H), 5.45 (d,  $J = 6.5$  Hz, 1H).  $^{13}\text{C NMR}$  (101 MHz,  $\text{CDCl}_3$ )  $\delta$  196.63, 144.59, 137.23, 134.86, 133.64, 129.13, 129.06, 128.86, 128.72, 128.26, 128.07, 122.43, 114.60, 62.70. **MS (ESI)**: found  $[\text{M}+\text{H}]^+$  321.5.

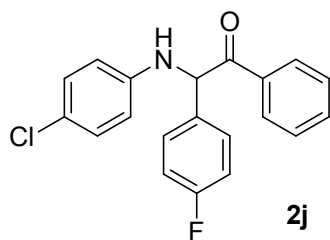

Yellow solid,  $^1\text{H NMR}$  (400 MHz,  $\text{CDCl}_3$ )  $\delta$  7.98 (d,  $J = 7.9$  Hz, 2H), 7.57 (t,  $J = 7.4$  Hz, 1H), 7.46 (t,  $J = 7.4$  Hz, 2H), 7.43 – 7.36 (m, 2H), 7.08 (d,  $J = 8.4$  Hz, 2H), 6.97 (t,  $J = 7.9$  Hz, 2H), 6.57 (d,  $J = 7.4$  Hz, 2H), 5.97 (d,  $J = 6.3$  Hz, 1H), 5.47 (d,  $J = 6.1$  Hz, 1H).  $^{13}\text{C NMR}$  (101 MHz,  $\text{CDCl}_3$ )  $\delta$  196.42, 144.25, 134.55, 133.82, 132.94 (d,  $J = 3.6$  Hz), 129.67 (d,  $J = 8.4$  Hz), 129.09, 128.80, 122.51, 116.16 (d,  $J = 21.7$  Hz), 114.52, 61.72. **MS (ESI):** found  $[\text{M}+\text{H}]^+$  340.1.

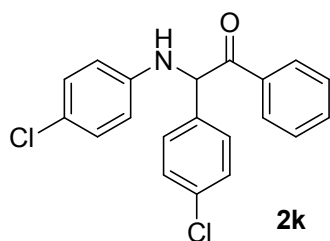

Yellow solid,  $^1\text{H NMR}$  (400 MHz,  $\text{CDCl}_3$ )  $\delta$  7.97 (d,  $J = 7.2$  Hz, 2H), 7.58 (t,  $J = 7.4$  Hz, 1H), 7.46 (t,  $J = 7.7$  Hz, 2H), 7.36 (d,  $J = 8.5$  Hz, 2H), 7.25 (d,  $J = 8.7$  Hz, 3H), 7.08 (d,  $J = 8.8$  Hz, 2H), 6.56 (d,  $J = 8.8$  Hz, 2H), 5.96 (d,  $J = 6.4$  Hz, 1H), 5.50 (d,  $J = 6.4$  Hz, 1H).  $^{13}\text{C NMR}$  (101 MHz,  $\text{CDCl}_3$ )  $\delta$  196.18, 144.14, 135.75, 134.48, 134.11, 133.90, 129.33, 129.30, 129.11, 128.82, 122.59, 114.52, 61.82. **MS (ESI):** found  $[\text{M}+\text{H}]^+$  355.7.

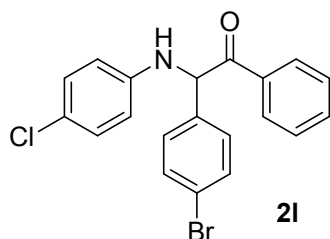

White solid,  $^1\text{H NMR}$  (400 MHz,  $\text{CDCl}_3$ )  $\delta$  7.96 (d,  $J = 7.2$  Hz, 2H), 7.58 (t,  $J = 7.4$  Hz, 1H), 7.49 – 7.38 (m, 4H), 7.33 – 7.24 (m, 3H), 7.08 (d,  $J = 8.8$  Hz, 2H), 6.55 (d,  $J = 8.8$  Hz, 2H), 5.94 (d,  $J = 6.4$  Hz, 1H), 5.48 (d,  $J = 6.4$  Hz, 1H).  $^{13}\text{C NMR}$  (101 MHz,  $\text{CDCl}_3$ )  $\delta$  196.15, 144.16, 141.22, 136.34, 134.53, 133.91, 132.28, 129.63, 129.13, 128.83, 122.68, 114.55, 61.94. **MS (ESI):** found  $[\text{M}+\text{H}]^+$  399.8.

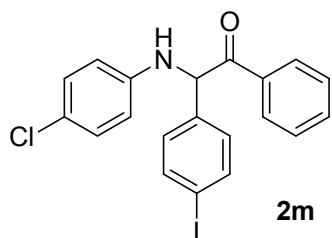

White solid,  $^1\text{H NMR}$  (300 MHz,  $\text{CDCl}_3$ )  $\delta$  7.97 (d,  $J = 7.9$  Hz, 2H), 7.59 (dd,  $J = 11.1, 7.9$  Hz, 3H), 7.46 (t,  $J = 7.6$  Hz, 2H), 7.17 (d,  $J = 8.0$  Hz, 2H), 7.08 (d,  $J = 8.3$  Hz, 2H), 6.55 (d,  $J = 8.3$  Hz, 2H), 5.92 (d,  $J = 6.4$  Hz, 1H), 5.49 (d,  $J = 6.0$  Hz, 1H).  $^{13}\text{C NMR}$  (101 MHz,  $\text{CDCl}_3$ )  $\delta$  196.06, 147.98, 144.11, 138.19, 137.00, 134.45, 133.93, 129.83, 129.12, 128.83, 114.50, 105.16, 61.99. **MS (ESI)**: found  $[\text{M}+\text{H}]^+$  447.5.

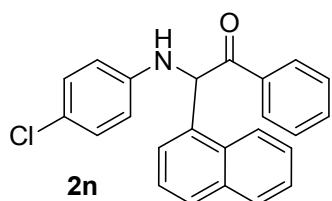

Yellow solid,  $^1\text{H NMR}$  (300 MHz,  $\text{CDCl}_3$ )  $\delta$  8.27 (d,  $J = 8.4$  Hz, 1H), 7.90 (d,  $J = 7.9$  Hz, 3H), 7.82 (d,  $J = 7.5$  Hz, 1H), 7.67 – 7.43 (m, 3H), 7.45 – 7.27 (m, 4H), 7.09 (d,  $J = 8.7$  Hz, 2H), 6.64 (dd,  $J = 12.3, 8.3$  Hz, 3H), 4.89 (d,  $J = 7.6$  Hz, 1H).  $^{13}\text{C NMR}$  (101 MHz,  $\text{CDCl}_3$ )  $\delta$  197.96, 145.32, 135.09, 134.29, 133.55, 132.76, 131.01, 129.56, 129.24, 129.16, 128.71, 128.52, 127.25, 126.77, 126.23, 125.48, 122.86, 122.79, 114.55, 60.02. **MS (ESI)**: found  $[\text{M}+\text{H}]^+$  372.1.

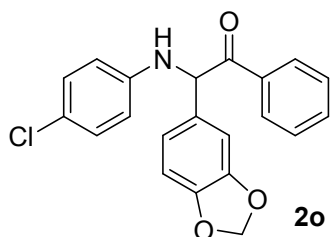

White solid,  $^1\text{H NMR}$  (300 MHz,  $\text{CDCl}_3$ )  $\delta$  7.98 (d,  $J = 7.1$  Hz, 2H), 7.55 (t,  $J = 7.4$  Hz, 1H), 7.44 (t,  $J = 7.5$  Hz, 2H), 7.07 (d,  $J = 8.9$  Hz, 2H), 6.91 (d,  $J = 8.0$  Hz, 1H), 6.85 (d,  $J = 1.7$  Hz, 1H), 6.70 (d,  $J = 8.0$  Hz, 1H), 6.58 (d,  $J = 8.9$  Hz, 2H), 5.89 (d,  $J = 5.7$  Hz, 3H), 5.45 (d,  $J = 6.3$  Hz, 1H).  $^{13}\text{C NMR}$  (101 MHz,  $\text{CDCl}_3$ )  $\delta$  196.35, 148.28, 147.52, 144.37, 134.63, 133.66, 130.84, 129.02, 128.81, 128.71, 122.31, 122.02, 114.54, 108.62, 107.85, 101.24, 62.03. **MS (ESI)**: found  $[\text{M}+\text{H}]^+$  366.1.

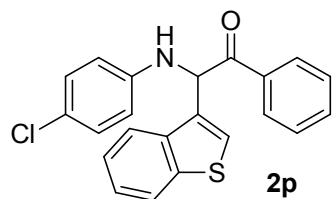

Yellow solid,  $^1\text{H NMR}$  (400 MHz,  $\text{CDCl}_3$ )  $\delta$  8.05 – 7.94 (m, 3H), 7.84 (d,  $J = 7.9$  Hz, 1H), 7.52 (t,  $J = 7.4$  Hz, 1H), 7.49 – 7.30 (m, 5H), 7.08 (d,  $J = 8.8$  Hz, 2H), 6.63 (d,  $J = 8.8$  Hz, 2H), 6.37 (s, 1H), 5.06 (s, 1H).  $^{13}\text{C NMR}$  (101 MHz,  $\text{CDCl}_3$ )  $\delta$  196.61, 145.00, 140.74, 136.96, 134.81, 133.76, 131.55, 129.14, 128.79, 128.54, 126.82, 124.92, 124.71, 123.08, 122.95, 121.86, 114.70, 57.69. **MS (ESI)**: found  $[\text{M}+\text{H}]^+$  337.8.

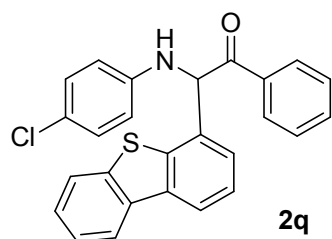

Yellow solid,  $^1\text{H NMR}$  (400 MHz,  $\text{CDCl}_3$ )  $\delta$  8.13 – 7.97 (m, 4H), 7.88 (d,  $J = 8.5$  Hz, 1H), 7.55 – 7.34 (m, 7H), 7.05 (d,  $J = 8.9$  Hz, 2H), 6.67 (d,  $J = 8.9$  Hz, 2H), 6.23 (d,  $J = 6.2$  Hz, 1H), 5.56 (d,  $J = 6.2$  Hz, 1H).  $^{13}\text{C NMR}$  (101 MHz,  $\text{CDCl}_3$ )  $\delta$  195.66, 144.41, 139.27, 138.00, 137.01, 135.20, 134.85, 133.72, 131.42, 129.09, 128.68, 128.64, 127.15, 126.94, 125.20, 124.61, 122.83, 122.72, 121.66, 114.89, 77.32, 77.00, 76.68, 62.58. **MS (ESI)**: found  $[\text{M}+\text{H}]^+$  427.8.

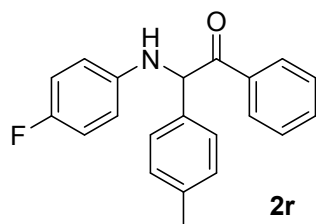

Yellow solid,  $^1\text{H NMR}$  (400 MHz,  $\text{CDCl}_3$ )  $\delta$  7.99 (d,  $J = 7.2$  Hz, 2H), 7.53 (t,  $J = 7.4$  Hz, 1H), 7.42 (t,  $J = 7.6$  Hz, 2H), 7.30 (d,  $J = 8.1$  Hz, 2H), 7.09 (d,  $J = 7.9$  Hz, 2H), 6.83 (t,  $J = 8.7$  Hz, 2H), 6.64 – 6.55 (m, 2H), 5.93 (d,  $J = 6.2$  Hz, 1H), 5.25 (d,  $J = 5.9$  Hz, 1H), 2.25 (s, 3H).  $^{13}\text{C NMR}$  (101 MHz,  $\text{CDCl}_3$ )  $\delta$  196.91, 155.80 (d,  $J = 235.3$  Hz), 142.41, 137.90, 134.87, 134.28, 133.39, 129.72, 128.72, 128.56, 127.86, 115.54 (d,  $J = 22.4$  Hz), 114.29 (d,  $J = 7.4$  Hz, 1H), 62.89, 20.97. **MS (ESI)**: found  $[\text{M}+\text{H}]^+$  319.5.



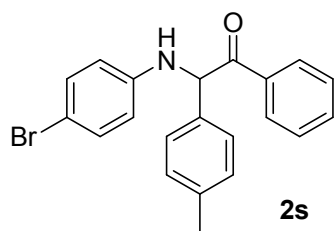

White solid,  $^1\text{H NMR}$  (400 MHz,  $\text{CDCl}_3$ )  $\delta$  8.04 – 7.94 (m, 2H), 7.53 (t,  $J = 7.4$  Hz, 1H), 7.42 (t,  $J = 7.6$  Hz, 2H), 7.29 (d,  $J = 8.1$  Hz, 2H), 7.18 (d,  $J = 8.9$  Hz, 2H), 7.08 (d,  $J = 7.9$  Hz, 2H), 6.53 (d,  $J = 8.9$  Hz, 2H), 5.93 (s, 1H), 5.45 (s, 1H), 2.24 (s, 3H).  $^{13}\text{C NMR}$  (101 MHz,  $\text{CDCl}_3$ )  $\delta$  196.58, 145.03, 138.10, 134.85, 134.06, 133.56, 131.89, 129.85, 128.85, 128.67, 127.96, 115.07, 109.36, 62.24, 21.06. **MS (ESI):** found  $[\text{M}+\text{H}]^+$  379.3.

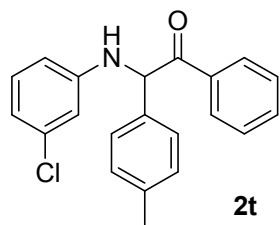

White solid,  $^1\text{H NMR}$  (400 MHz,  $\text{CDCl}_3$ )  $\delta$  7.99 (d,  $J = 7.2$  Hz, 2H), 7.54 (t,  $J = 7.4$  Hz, 1H), 7.43 (t,  $J = 6.9$  Hz, 2H), 7.31 (d,  $J = 8.1$  Hz, 2H), 7.09 (d,  $J = 7.9$  Hz, 2H), 7.02 (t,  $J = 8.3$  Hz, 1H), 6.63 (d,  $J = 7.2$  Hz, 2H), 6.53 (d,  $J = 7.5$  Hz, 1H), 5.95 (d,  $J = 6.6$  Hz, 1H), 5.53 (d,  $J = 6.5$  Hz, 1H), 2.25 (s, 3H).  $^{13}\text{C NMR}$  (101 MHz,  $\text{CDCl}_3$ )  $\delta$  196.44, 147.17, 138.11, 134.86, 134.74, 134.05, 133.59, 130.15, 129.88, 128.88, 128.68, 127.93, 117.55, 113.11, 111.74, 62.04, 21.08. **MS (ESI):** found  $[\text{M}+\text{H}]^+$  336.2.

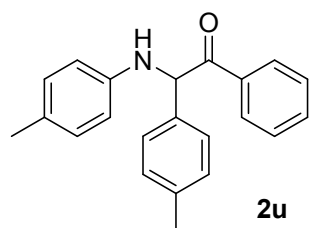

Yellow solid,  $^1\text{H NMR}$  (400 MHz,  $\text{CDCl}_3$ )  $\delta$  7.99 (d,  $J = 8.6$  Hz, 2H), 7.53 (t,  $J = 7.4$  Hz, 1H), 7.42 (t,  $J = 7.7$  Hz, 2H), 7.31 (d,  $J = 8.1$  Hz, 2H), 7.08 (d,  $J = 8.0$  Hz, 2H), 6.93 (d,  $J = 8.2$  Hz, 2H), 6.58 (d,  $J = 8.4$  Hz, 2H), 5.98 (d,  $J = 6.5$  Hz, 1H), 5.21 (d,  $J = 6.4$  Hz, 1H), 2.24 (s, 3H), 2.19 (s, 3H).  $^{13}\text{C NMR}$  (101 MHz,  $\text{CDCl}_3$ )  $\delta$  197.32, 143.88, 137.81, 135.16, 134.70, 133.37, 129.74, 129.69, 128.83, 128.62, 127.99, 126.93, 113.63, 62.68, 21.07, 20.37. **MS (ESI):** found  $[\text{M}+\text{H}]^+$  315.6.

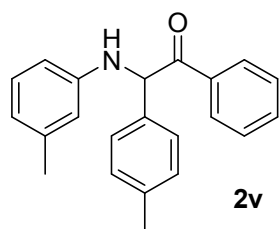

Yellow solid,  $^1\text{H NMR}$  (400 MHz,  $\text{CDCl}_3$ )  $\delta$  8.00 (d,  $J = 8.5$  Hz, 2H), 7.52 (t,  $J = 7.4$  Hz, 1H), 7.42 (t,  $J = 7.6$  Hz, 2H), 7.32 (d,  $J = 8.0$  Hz, 2H), 7.08 (d,  $J = 7.9$  Hz, 2H), 7.01 (t,  $J = 7.9$  Hz, 1H), 6.48 (dd,  $J = 14.2, 7.2$  Hz, 3H), 5.99 (s, 1H), 5.33 (s, 1H), 2.24 (s, 1H), 2.23 (s, 1H).  $^{13}\text{C NMR}$  (101 MHz,  $\text{CDCl}_3$ )  $\delta$  197.11, 146.11, 138.90, 137.76, 134.97, 134.64, 133.38, 129.71, 129.02, 128.81, 128.58, 127.93, 118.64, 114.34, 110.30, 62.26, 29.63, 21.58, 21.04. **MS (ESI)**: found  $[\text{M}+\text{H}]^+$  315.5.

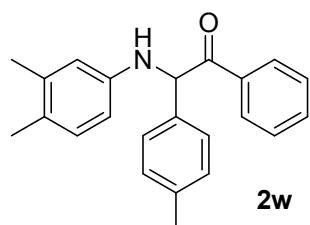

Yellow solid,  $^1\text{H NMR}$  (400 MHz,  $\text{CDCl}_3$ )  $\delta$  7.99 (d,  $J = 9.5$  Hz, 2H), 7.50 (t,  $J = 7.4$  Hz, 1H), 7.40 (t,  $J = 6.9$  Hz, 2H), 7.31 (d,  $J = 8.1$  Hz, 2H), 7.07 (d,  $J = 7.9$  Hz, 2H), 6.87 (d,  $J = 8.1$  Hz, 1H), 6.51 (s, 1H), 6.41 (d,  $J = 10.6$  Hz, 1H), 5.97 (s, 1H), 5.14 (s, 1H), 2.23 (s, 3H), 2.14 (s, 3H), 2.10 (s, 3H).  $^{13}\text{C NMR}$  (101 MHz,  $\text{CDCl}_3$ )  $\delta$  197.41, 144.32, 137.70, 137.21, 135.22, 134.84, 133.29, 130.17, 129.70, 128.80, 128.57, 127.95, 125.73, 115.51, 110.71, 62.64, 29.67, 21.03, 20.00, 18.65. **MS (ESI)**: found  $[\text{M}+\text{H}]^+$  329.9.

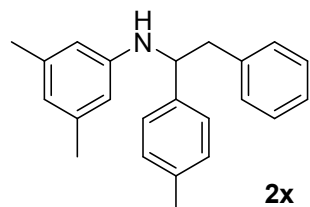

Yellow solid,  $^1\text{H NMR}$  (400 MHz,  $\text{CDCl}_3$ )  $\delta$  7.99 (d,  $J = 8.5$  Hz, 2H), 7.52 (t,  $J = 7.4$  Hz, 1H), 7.42 (t,  $J = 7.6$  Hz, 2H), 7.32 (d,  $J = 8.1$  Hz, 2H), 7.08 (d,  $J = 7.9$  Hz, 2H), 6.34 (s, 1H), 6.30 (s, 2H), 5.98 (s, 1H), 5.24 (s, 1H), 2.25 (s, 3H), 2.18 (s, 6H).  $^{13}\text{C NMR}$  (101 MHz,  $\text{CDCl}_3$ )  $\delta$  197.31, 146.28, 138.79, 137.74, 135.19, 134.87, 133.34, 129.73, 128.84, 128.61, 127.95, 119.82, 111.41, 62.40, 29.69, 21.48, 21.06. **MS (ESI)**:

found  $[M+H]^+$  329.9.

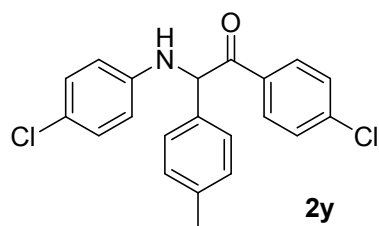

White solid,  $^1\text{H NMR}$  (400 MHz,  $\text{CDCl}_3$ )  $\delta$  7.92 (d,  $J = 8.6$  Hz, 2H), 7.40 (d,  $J = 8.6$  Hz, 2H), 7.27 (d,  $J = 8.1$  Hz, 3H), 7.08 (dd,  $J = 14.3, 8.4$  Hz, 4H), 6.56 (d,  $J = 8.8$  Hz, 2H), 5.87 (d,  $J = 3.7$  Hz, 1H), 5.38 (s, 1H), 2.26 (s, 3H).  $^{13}\text{C NMR}$  (101 MHz,  $\text{CDCl}_3$ )  $\delta$  195.47, 144.52, 140.08, 138.35, 133.88, 133.16, 130.22, 129.98, 129.07, 129.05, 127.94, 122.51, 114.62, 62.56, 21.08. **MS (ESI)**: found  $[M+H]^+$  369.4.

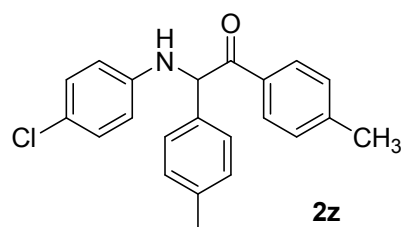

Yellow solid,  $^1\text{H NMR}$  (400 MHz,  $\text{CDCl}_3$ )  $\delta$  7.99 (d,  $J = 8.6$  Hz, 2H), 7.56 – 7.48 (m, 1H), 7.42 (t,  $J = 7.6$  Hz, 2H), 7.31 (d,  $J = 8.1$  Hz, 2H), 7.08 (d,  $J = 7.9$  Hz, 2H), 6.93 (d,  $J = 8.1$  Hz, 2H), 6.58 (d,  $J = 8.4$  Hz, 2H), 5.98 (s, 1H), 5.21 (s, 1H), 2.24 (s, 3H), 2.19 (s, 3H).  $^{13}\text{C NMR}$  (101 MHz,  $\text{CDCl}_3$ )  $\delta$  197.30, 143.87, 137.79, 135.14, 134.69, 133.36, 129.73, 129.67, 128.82, 128.61, 127.97, 126.91, 113.62, 62.66, 21.06, 20.36. **MS (ESI)**: found  $[M+H]^+$  349.7.

## Key intermediate A was detected by GC-MS

质谱

流路号:1 保留时间:17.780(扫描数:2657)  
质量峰:203  
原始模式:平均 17.775-17.785(2656-2658) 基峰:138(2524)  
背景模式:从峰校准 组 1 - 事件 1

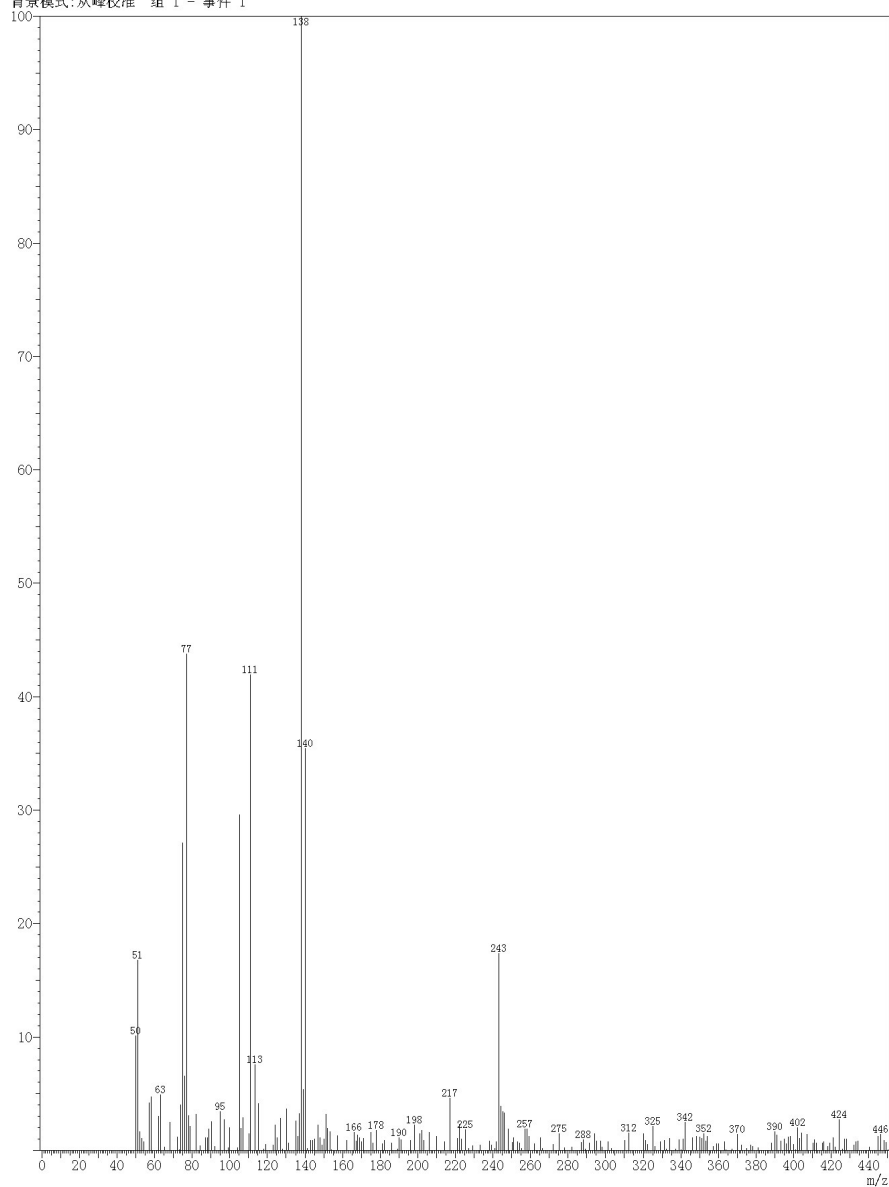

**$^1\text{H}$  and  $^{13}\text{C}$  NMR spectra of Products**

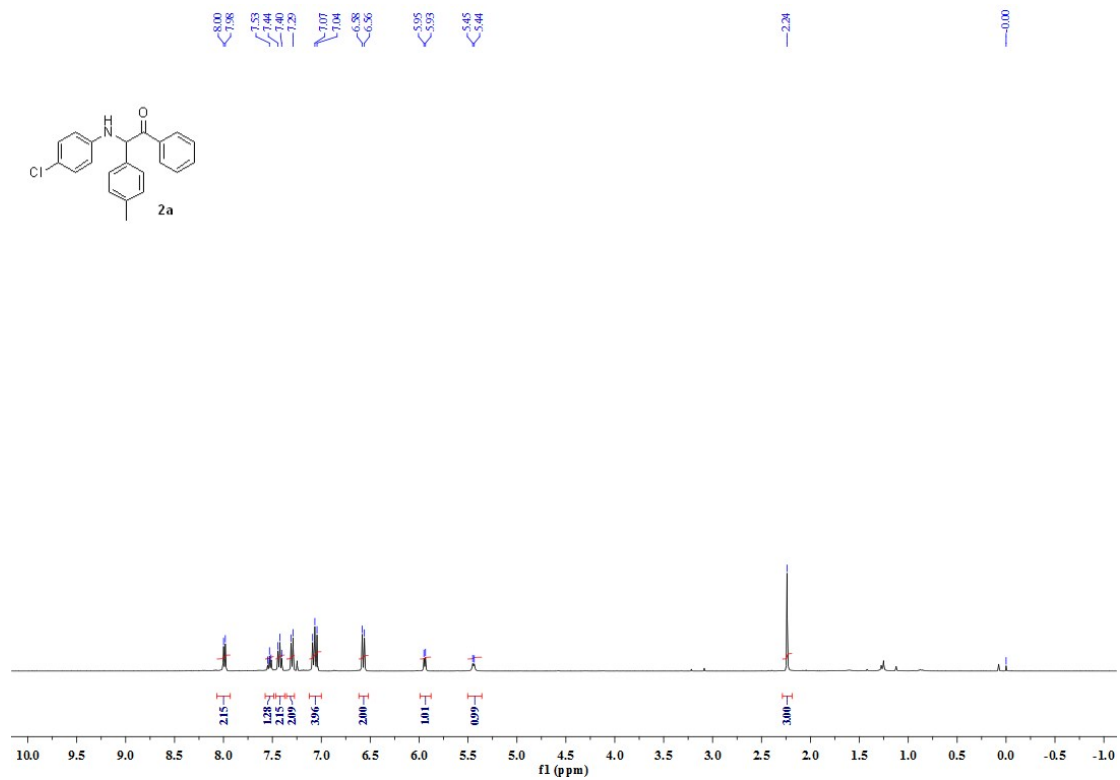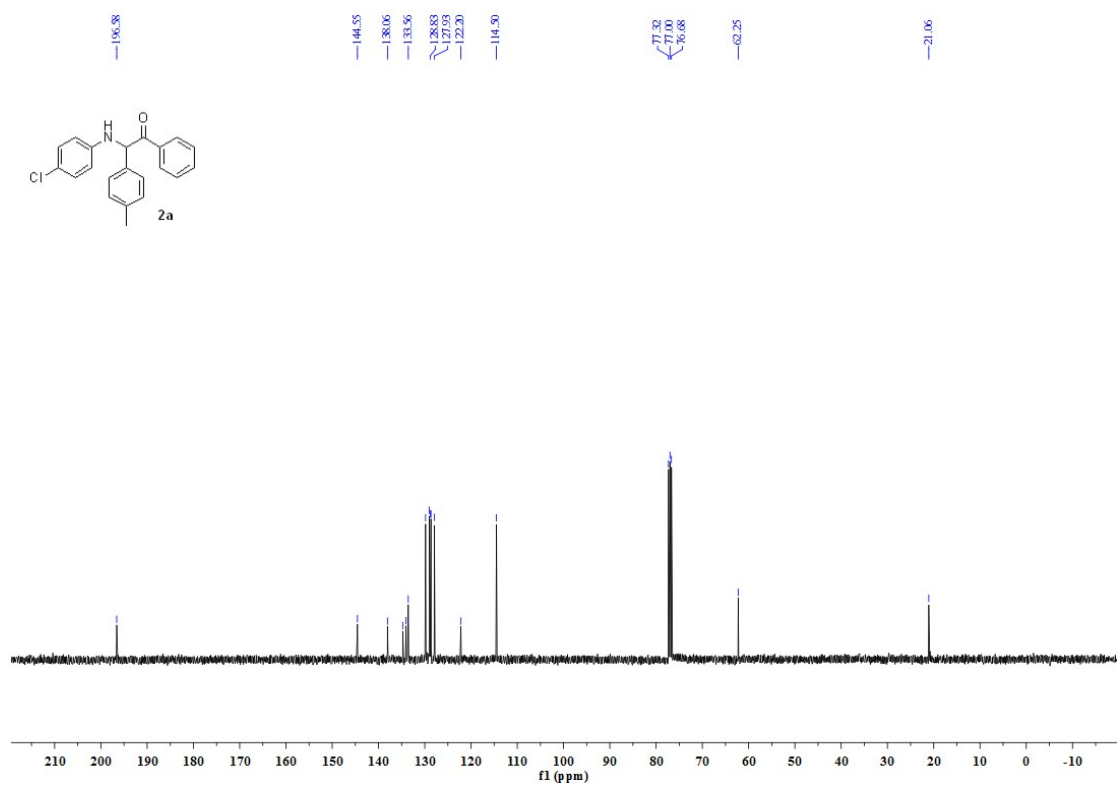

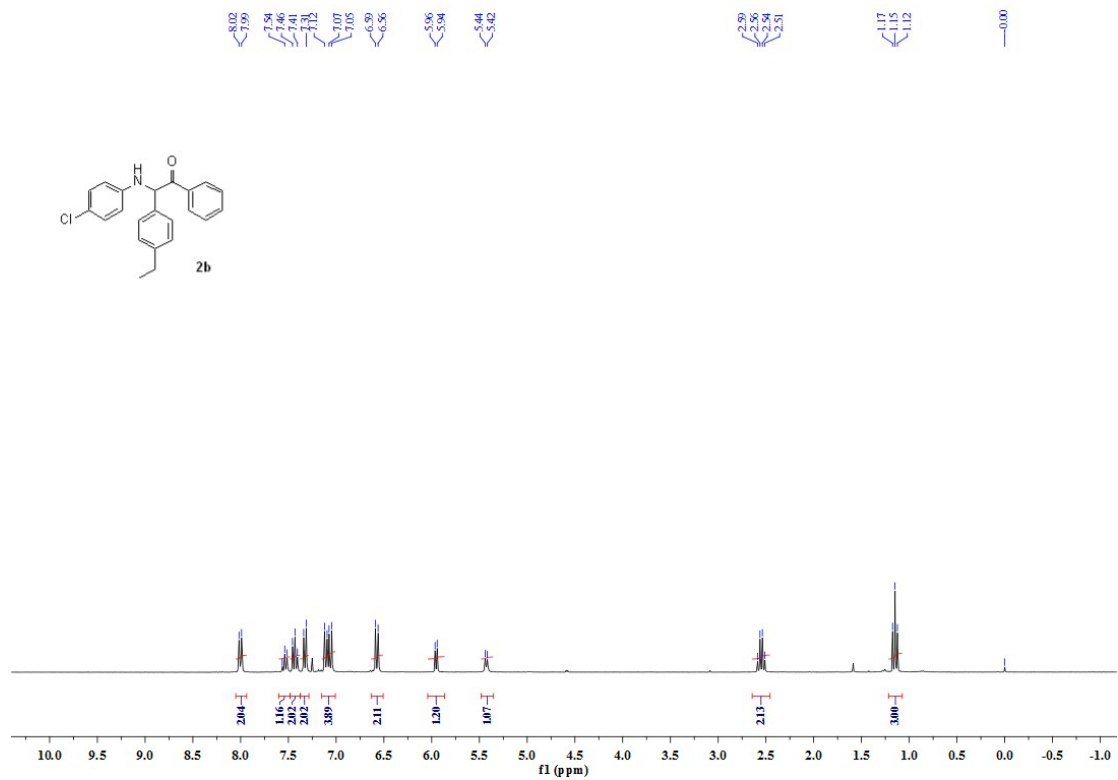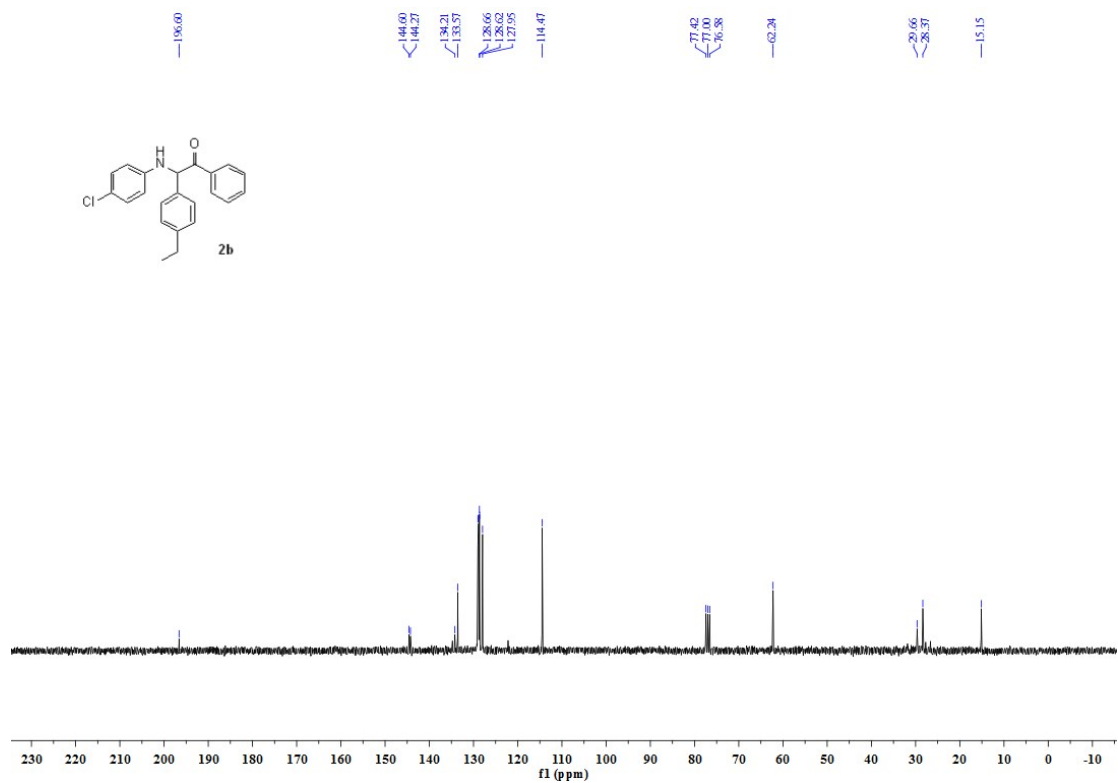

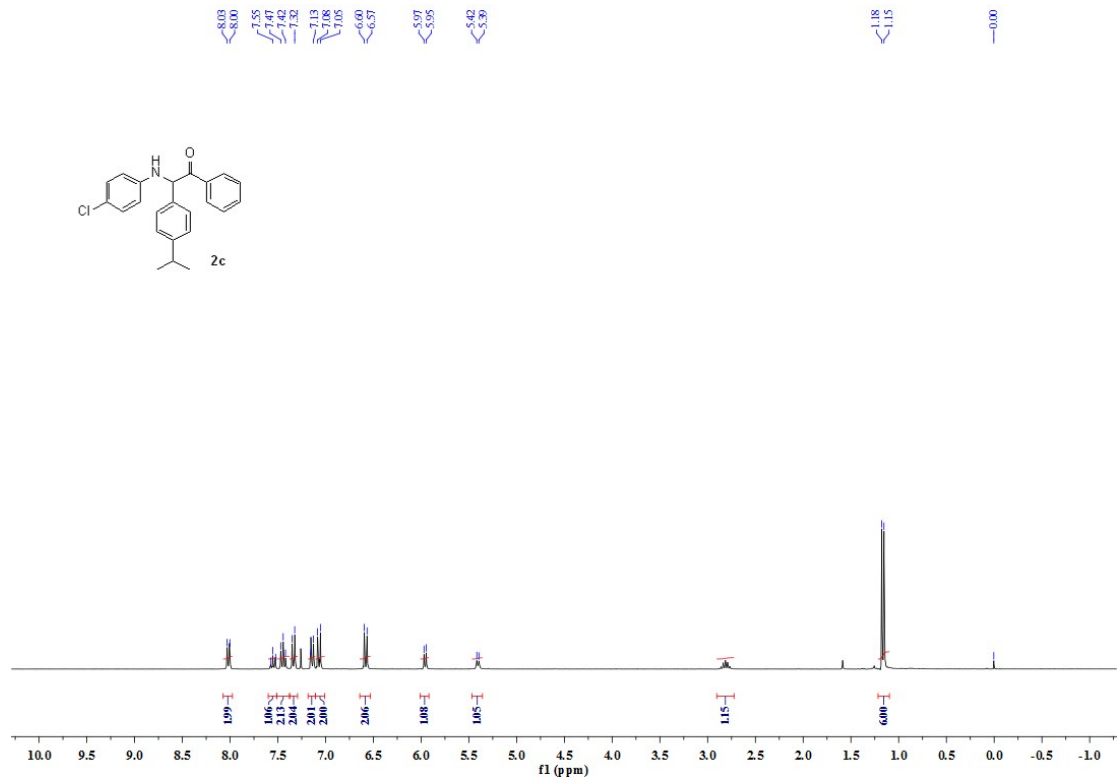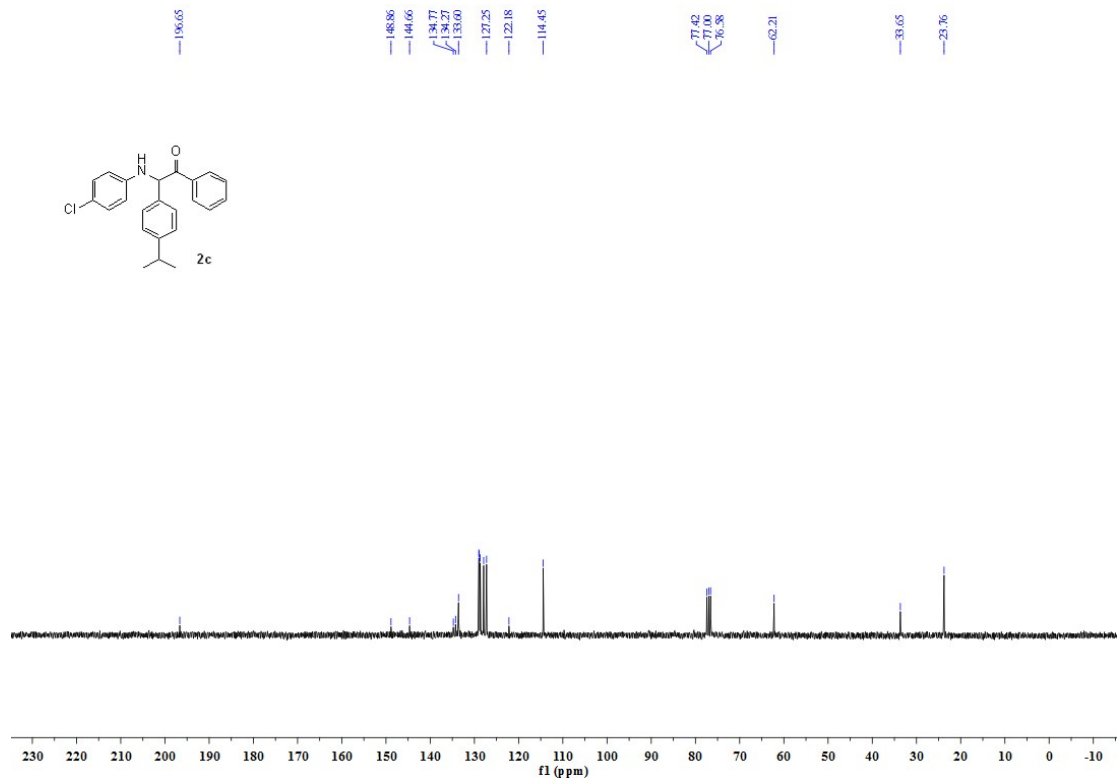

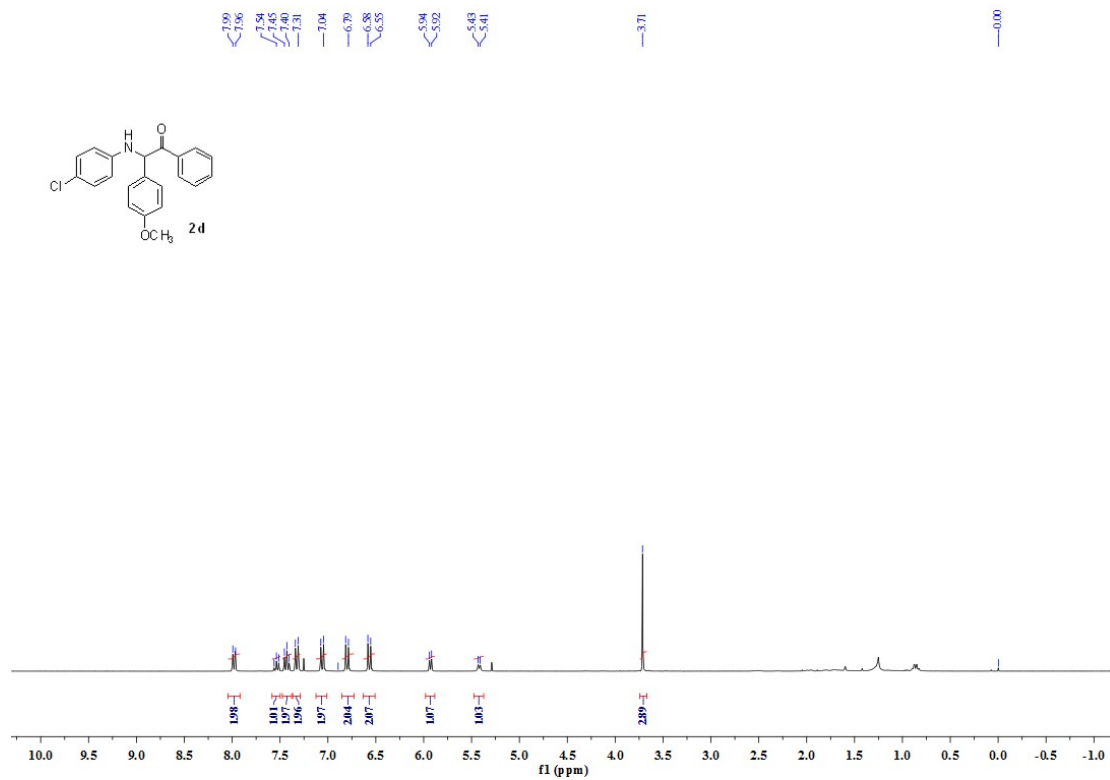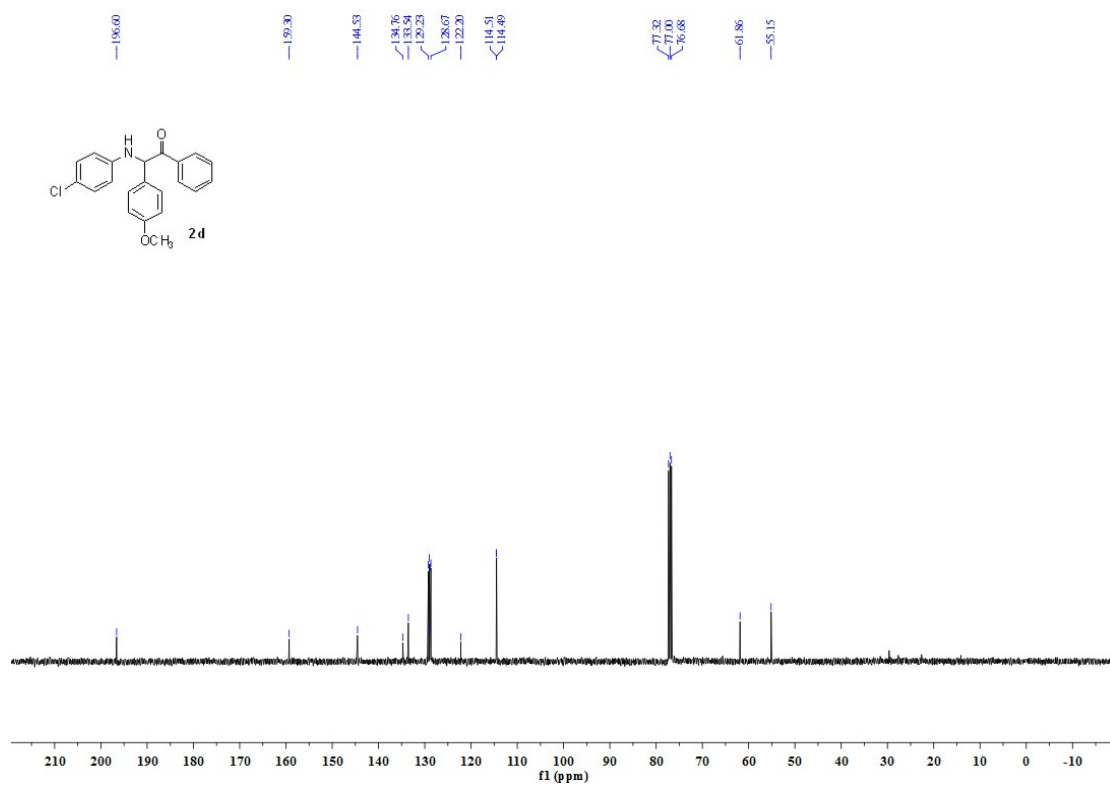



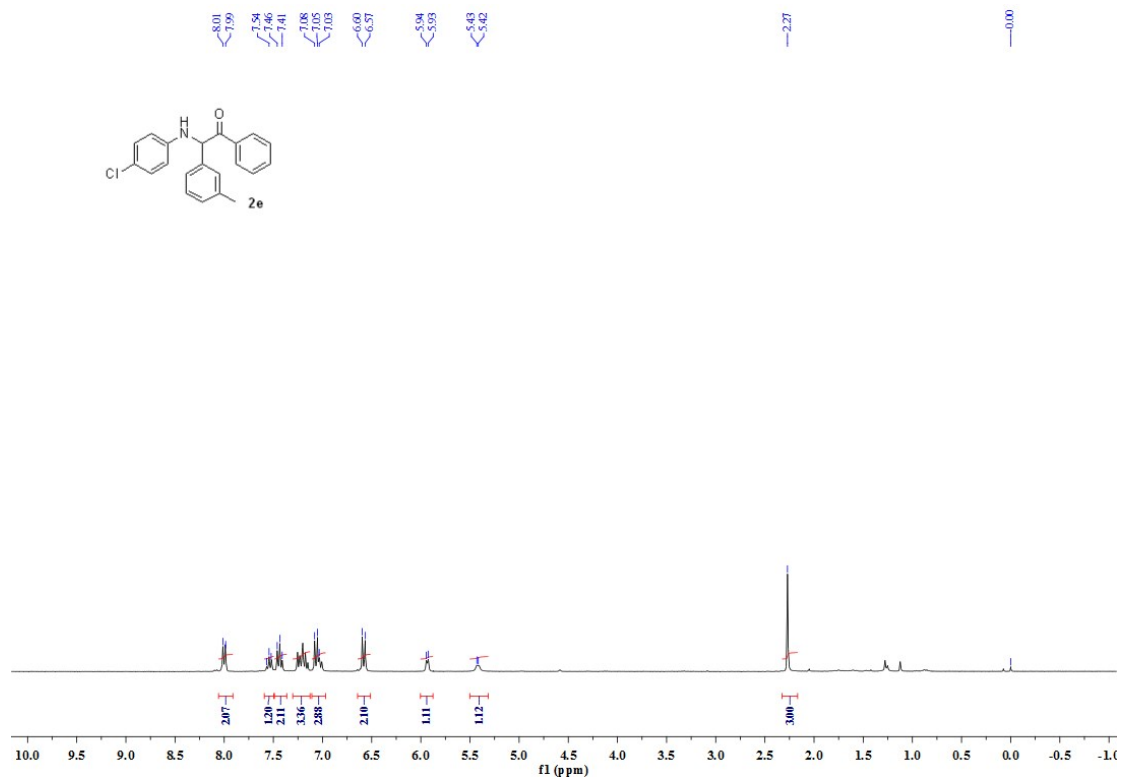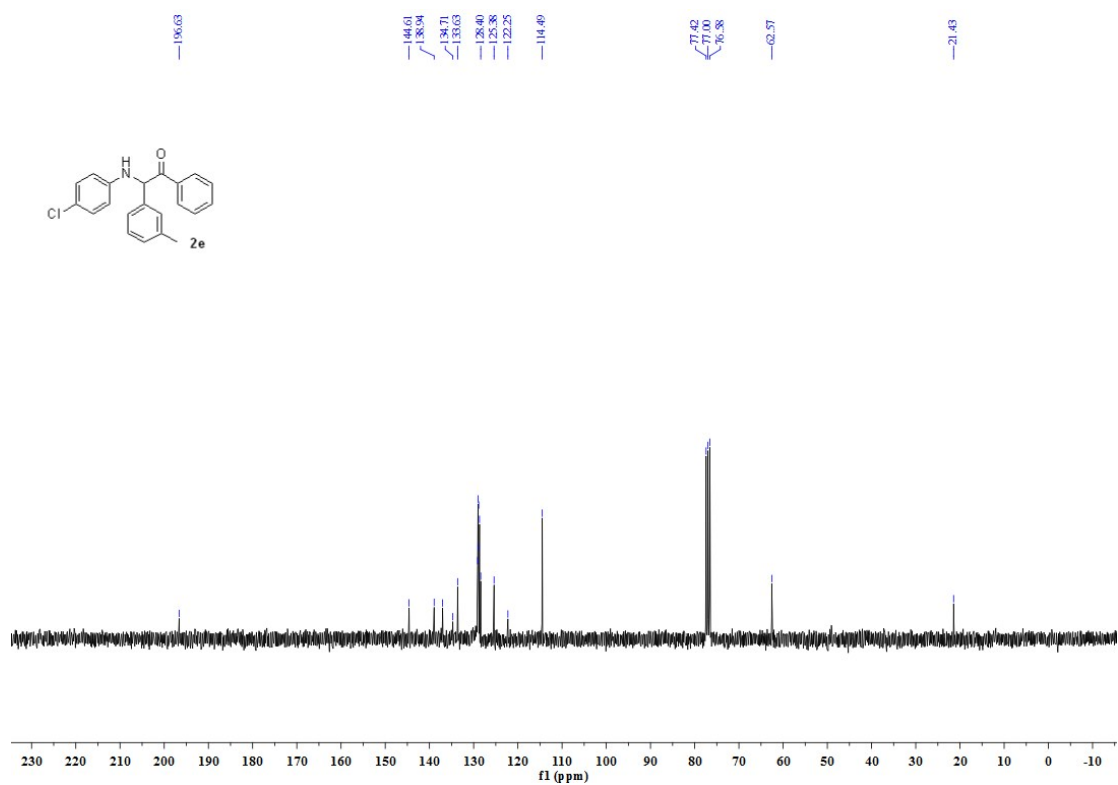

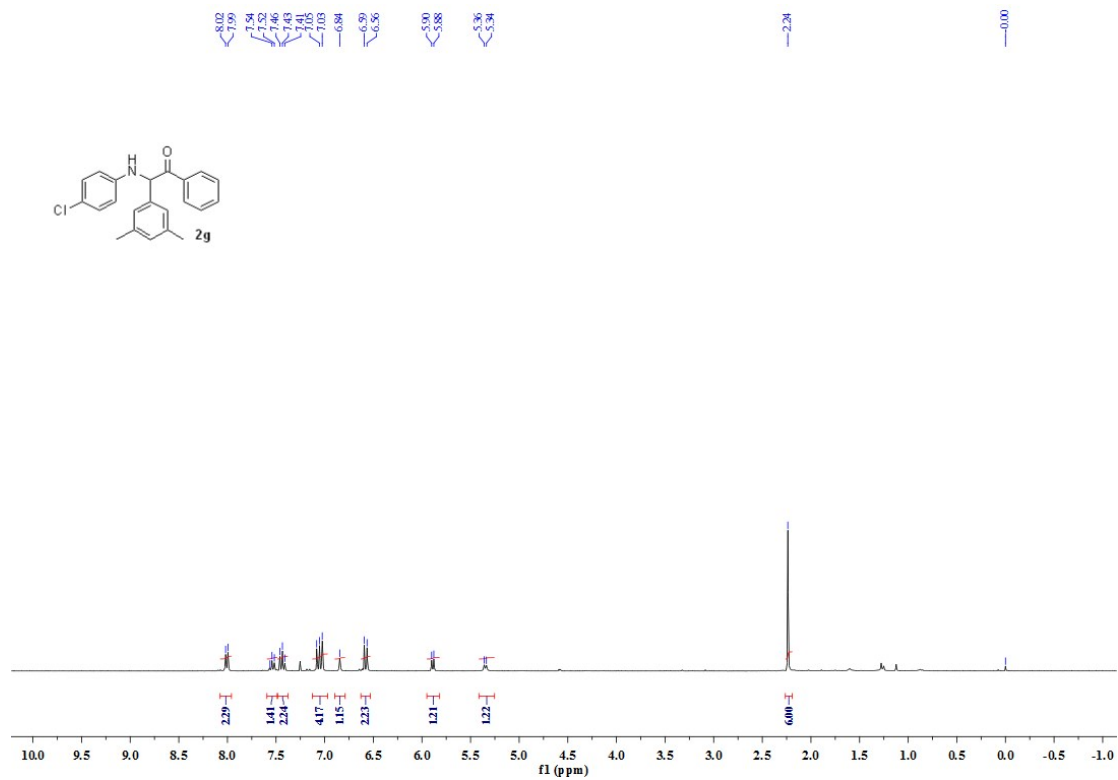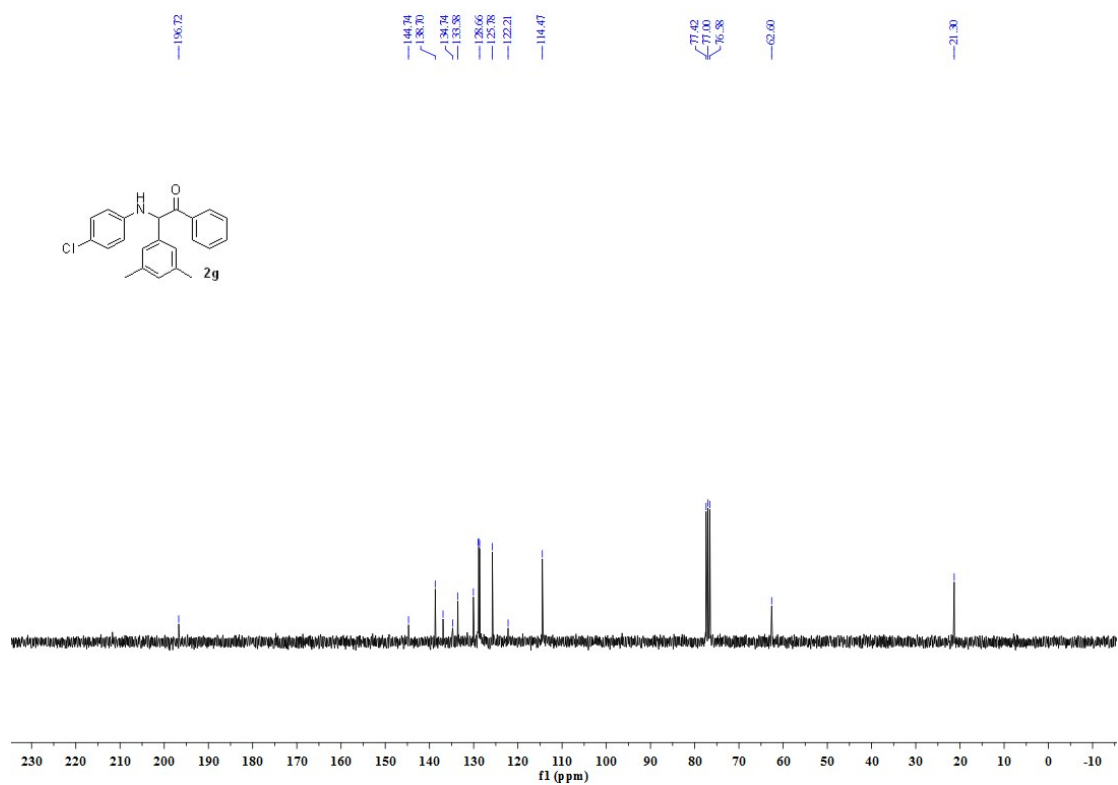

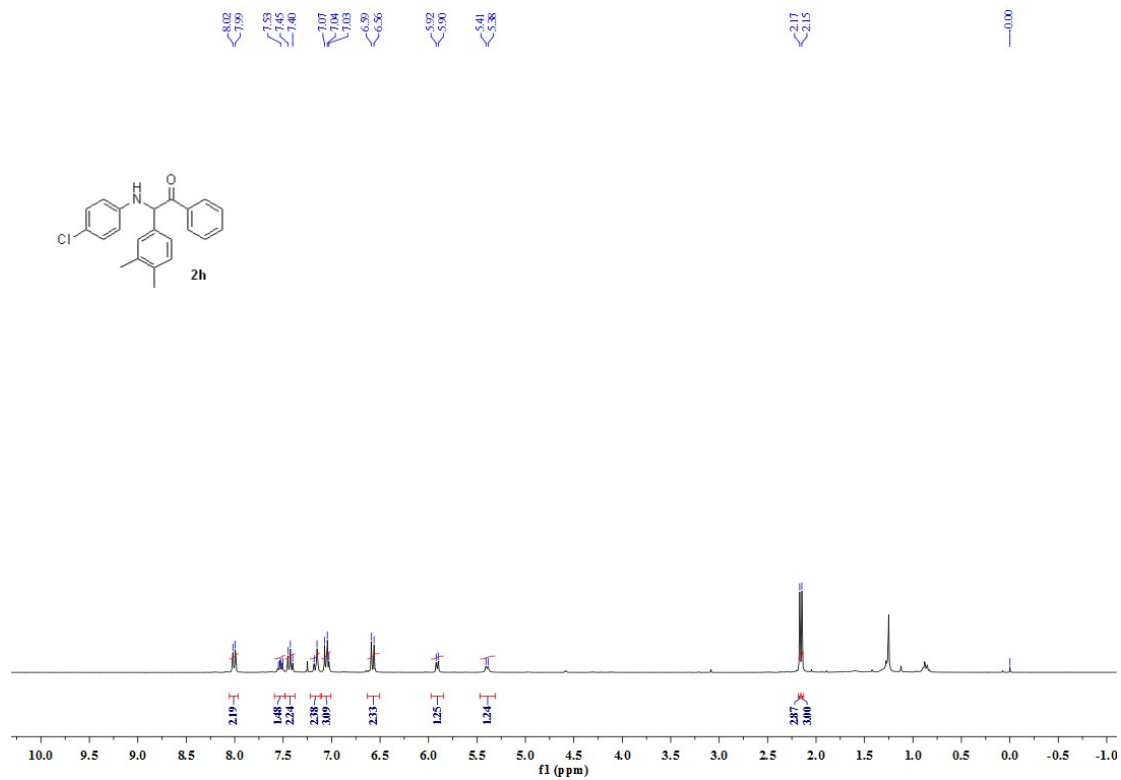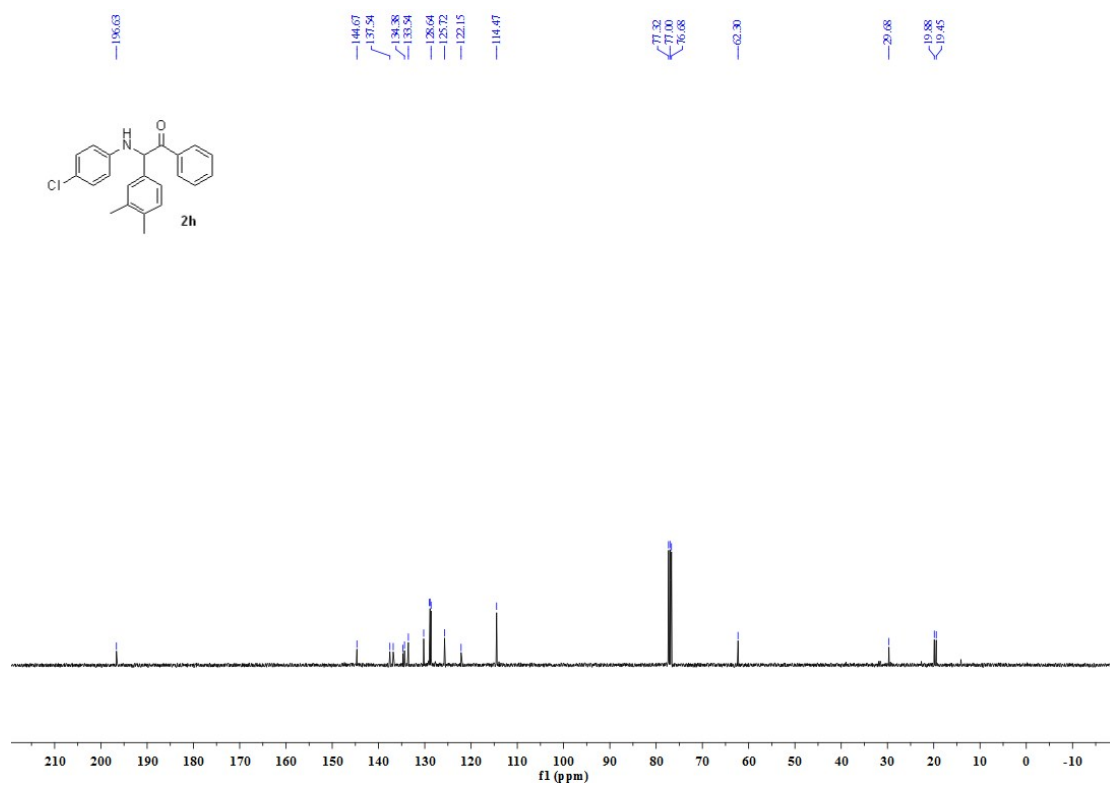

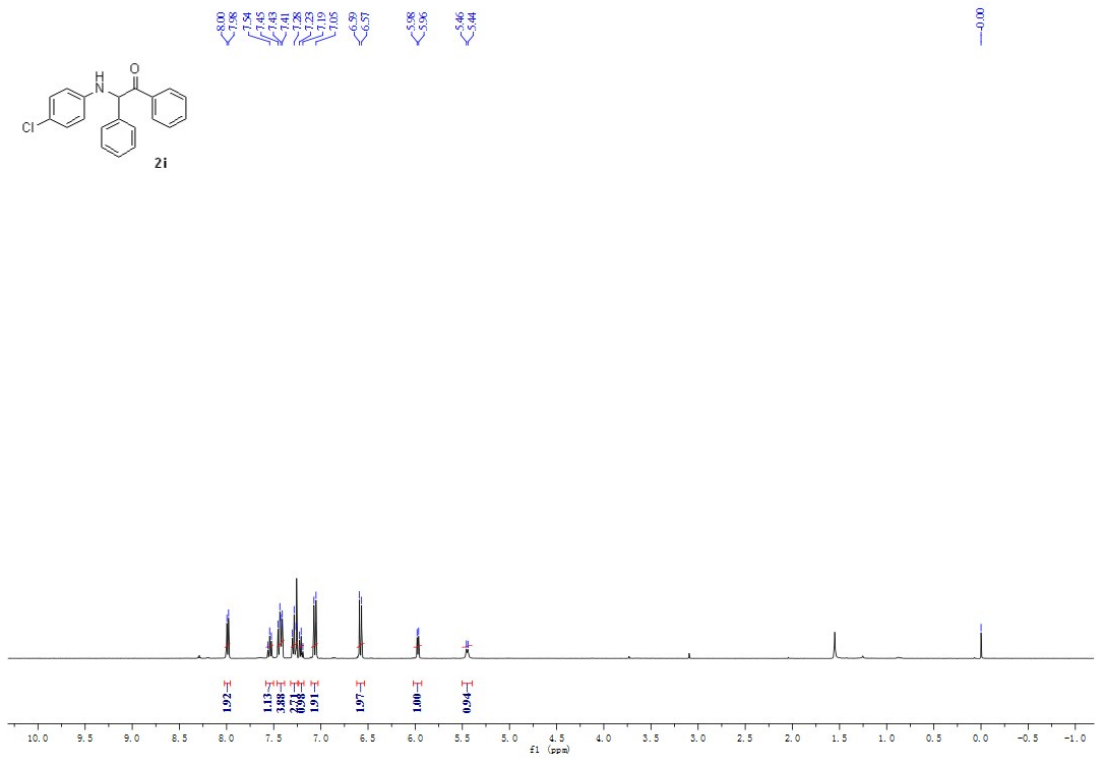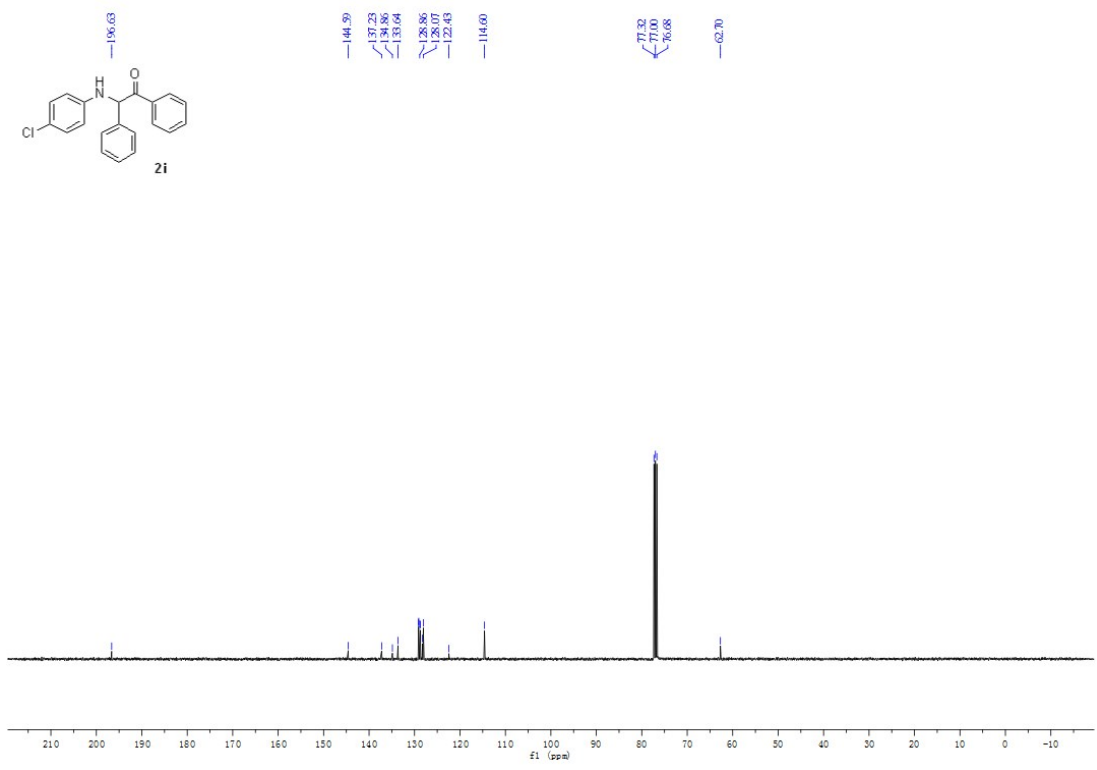

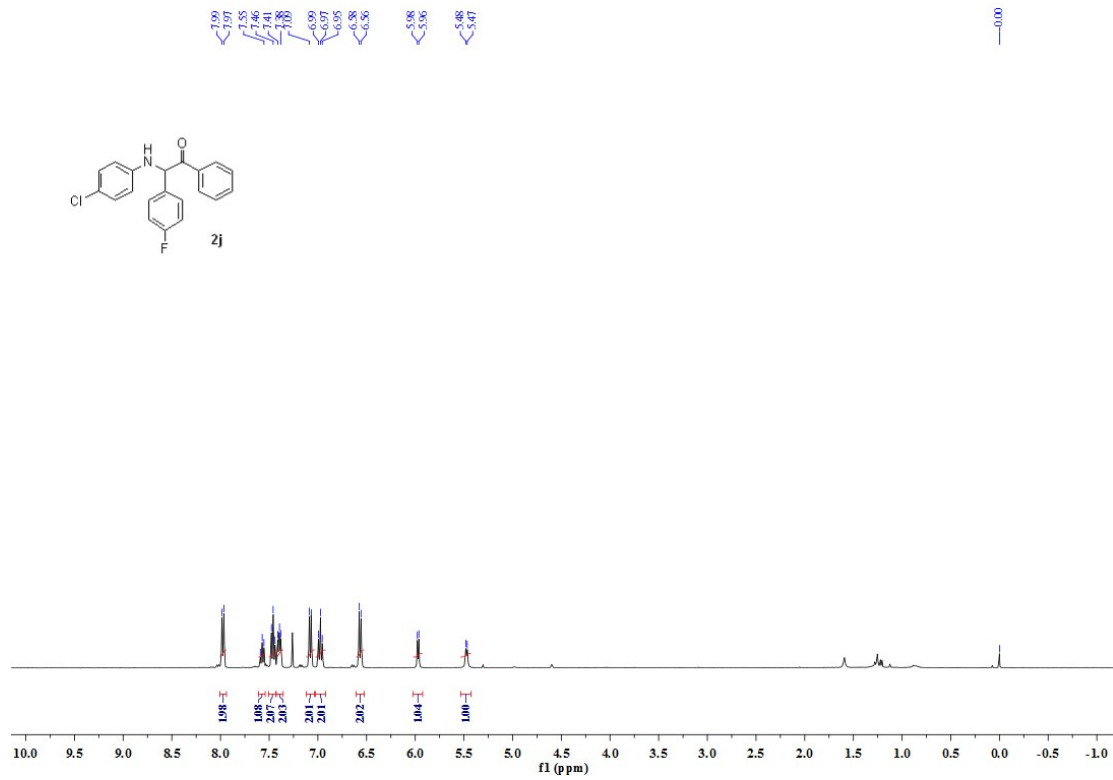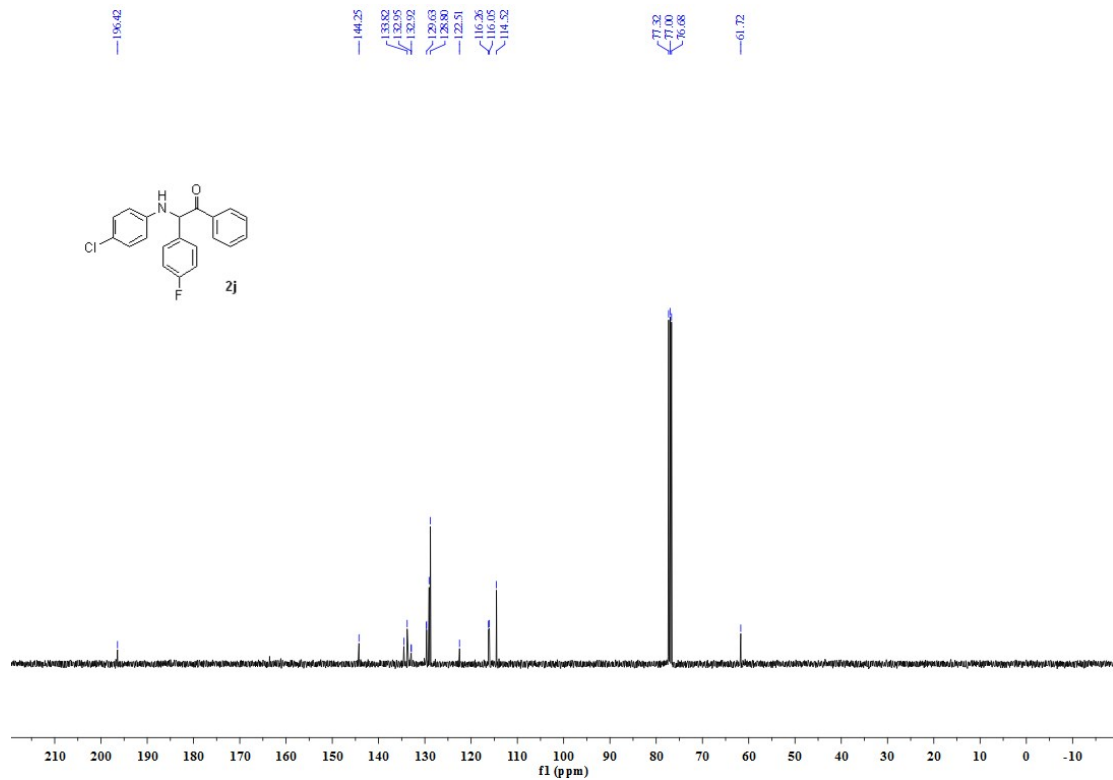

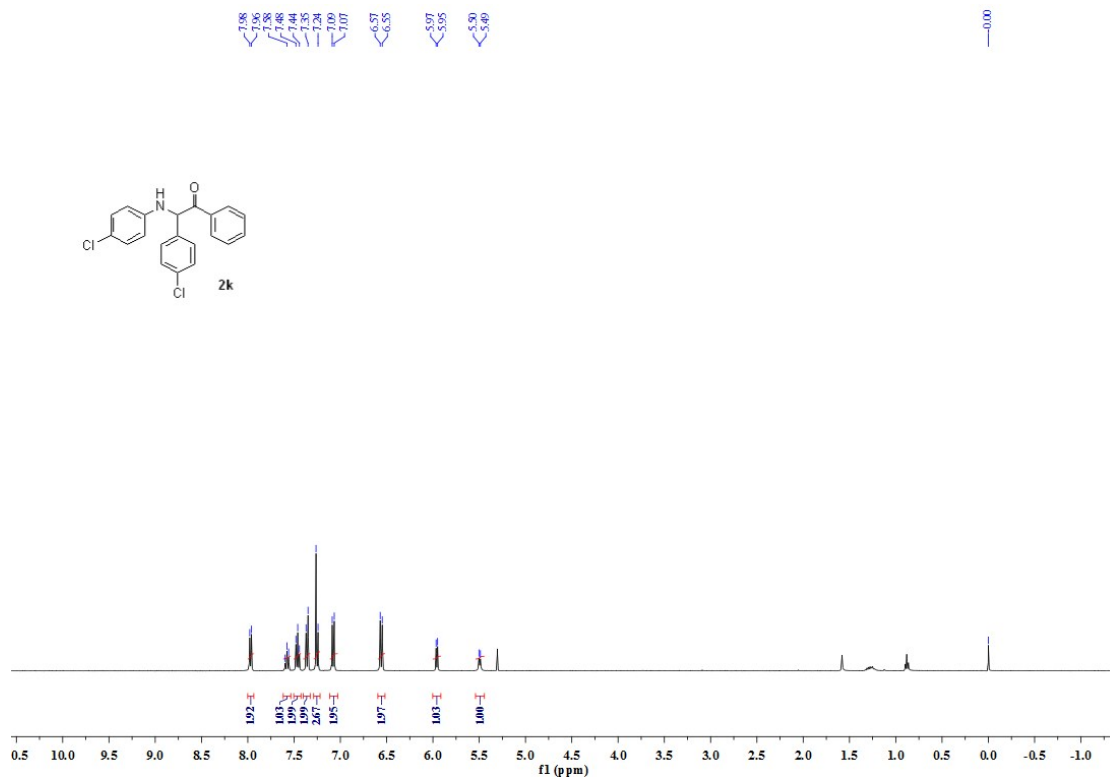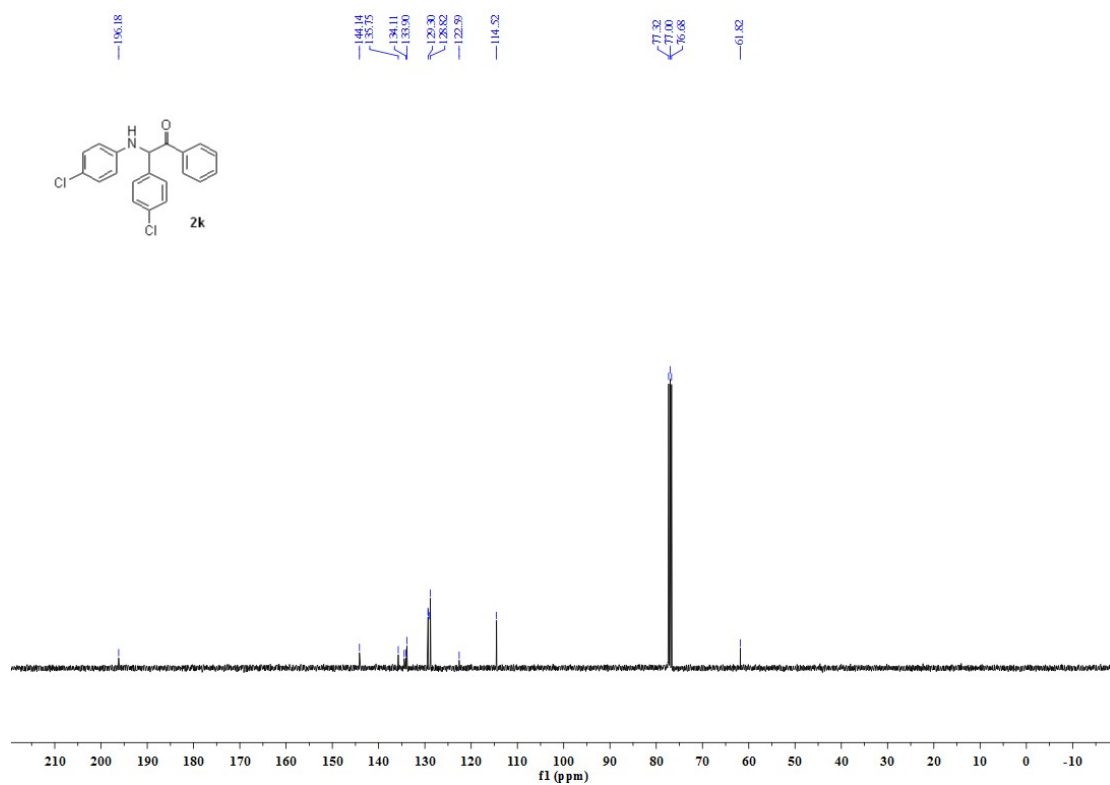

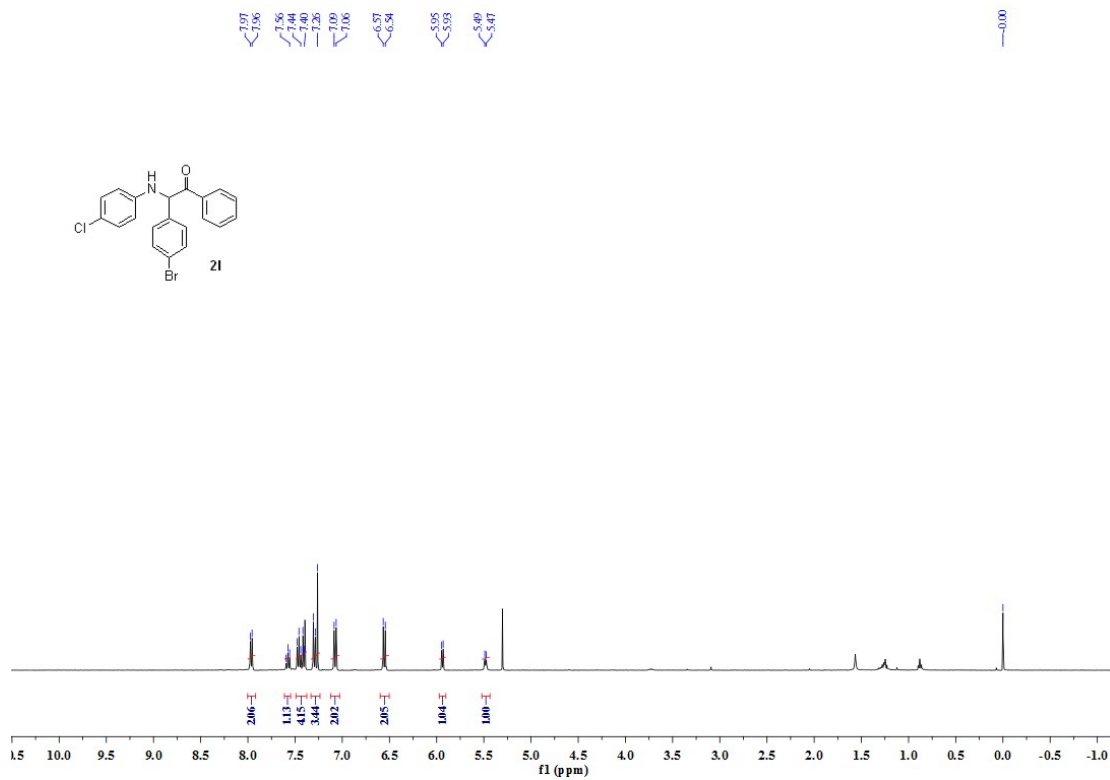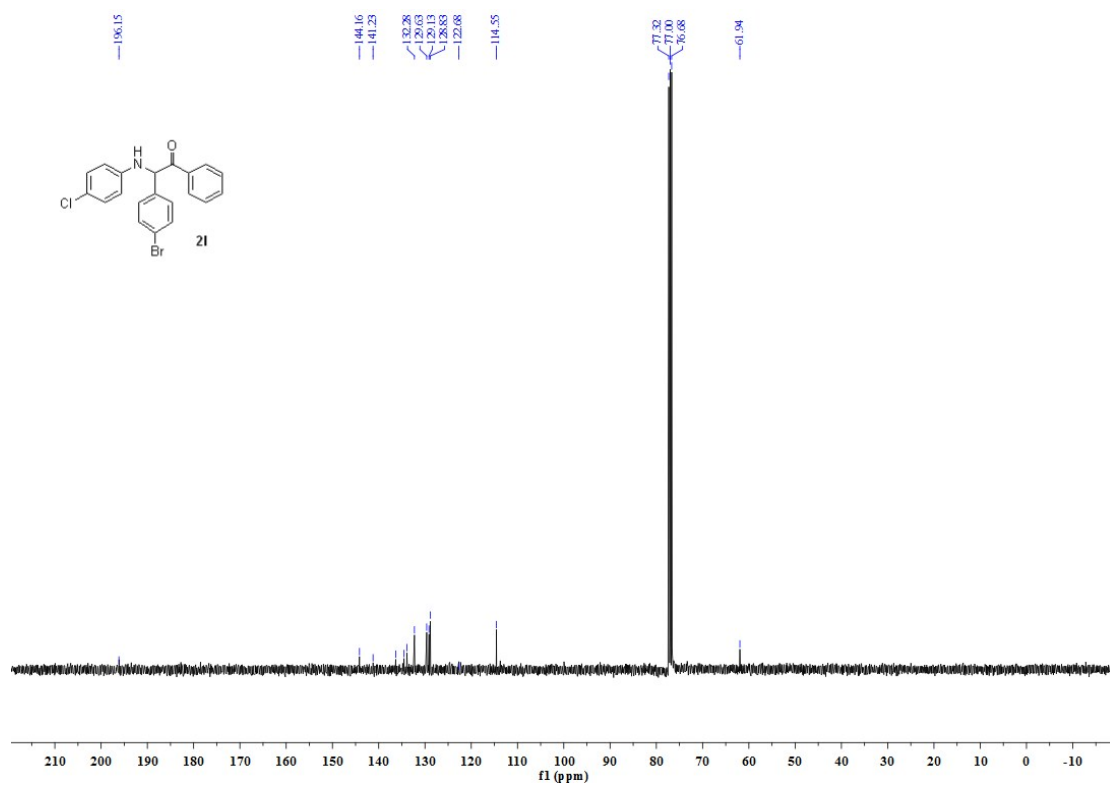

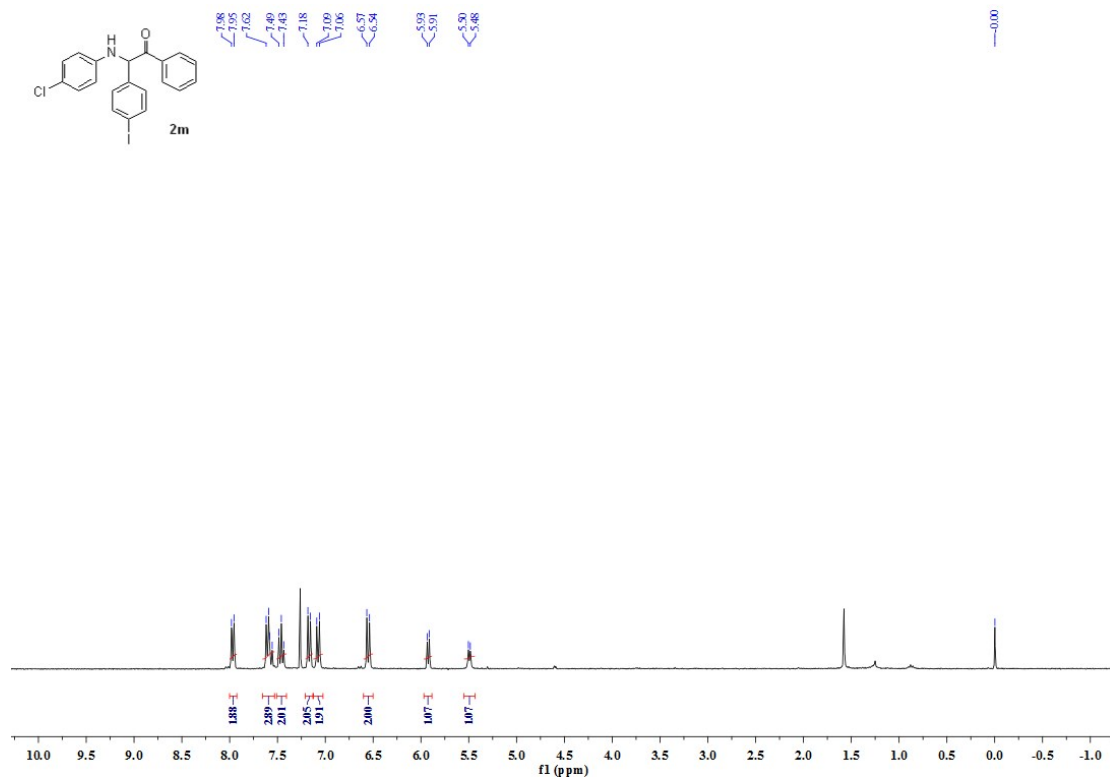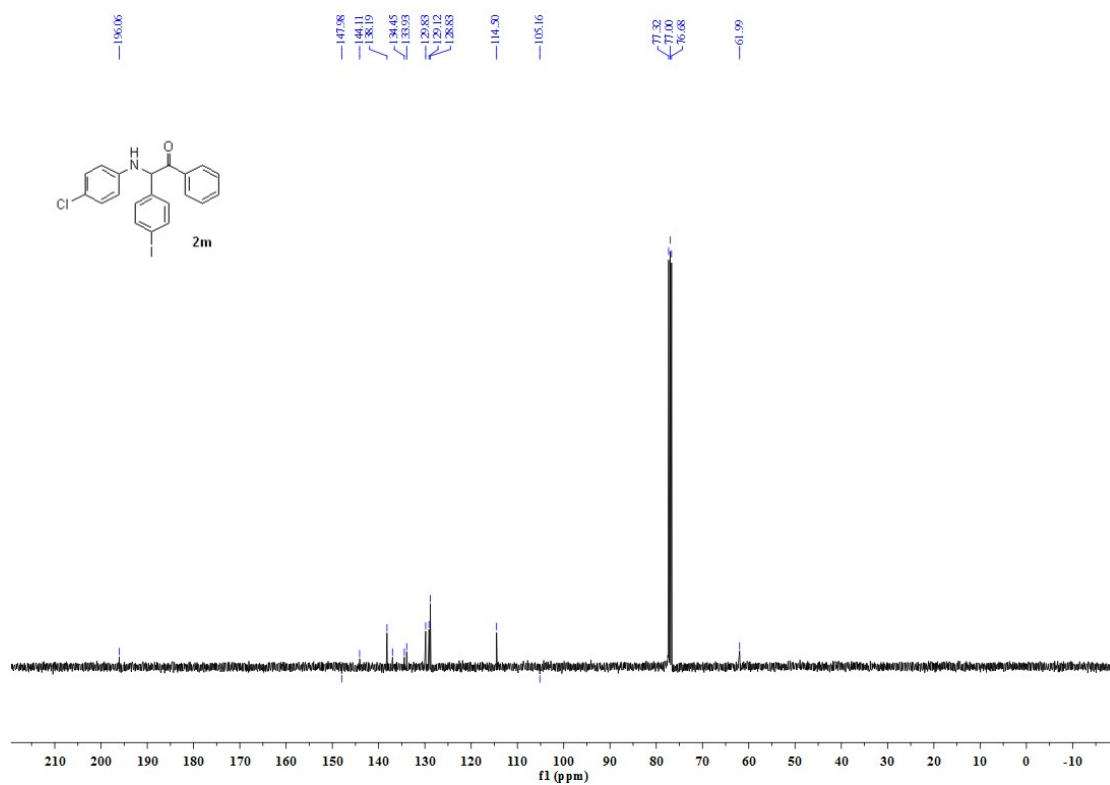



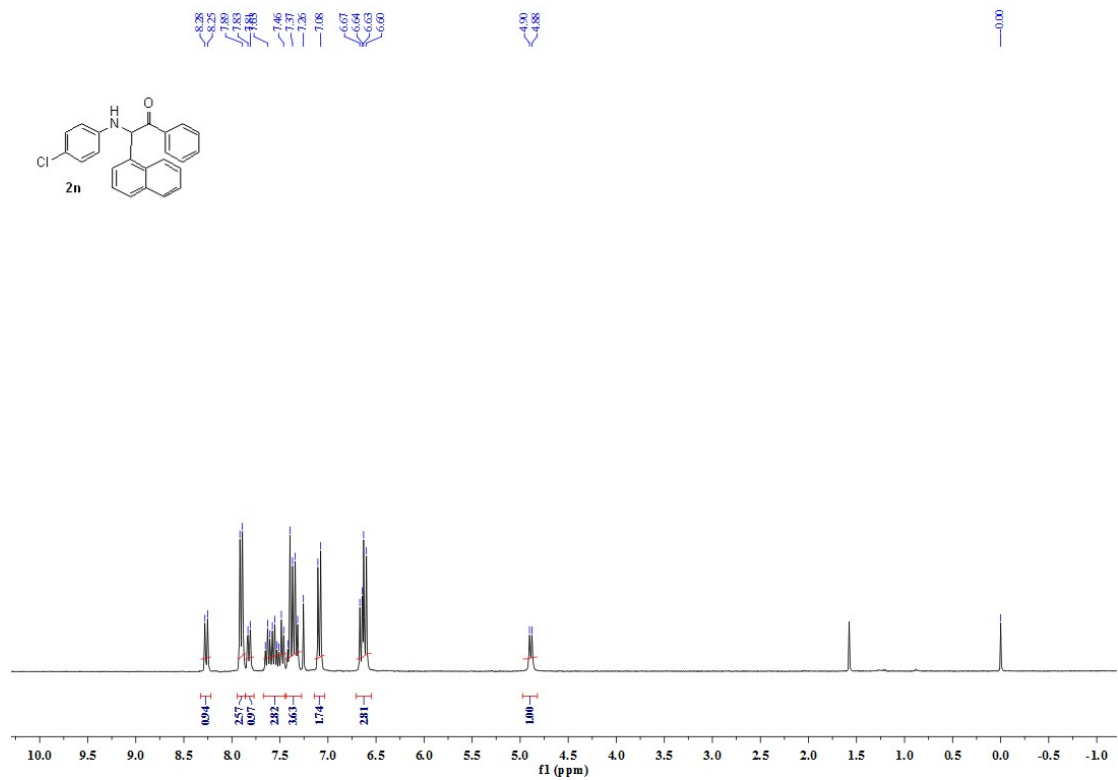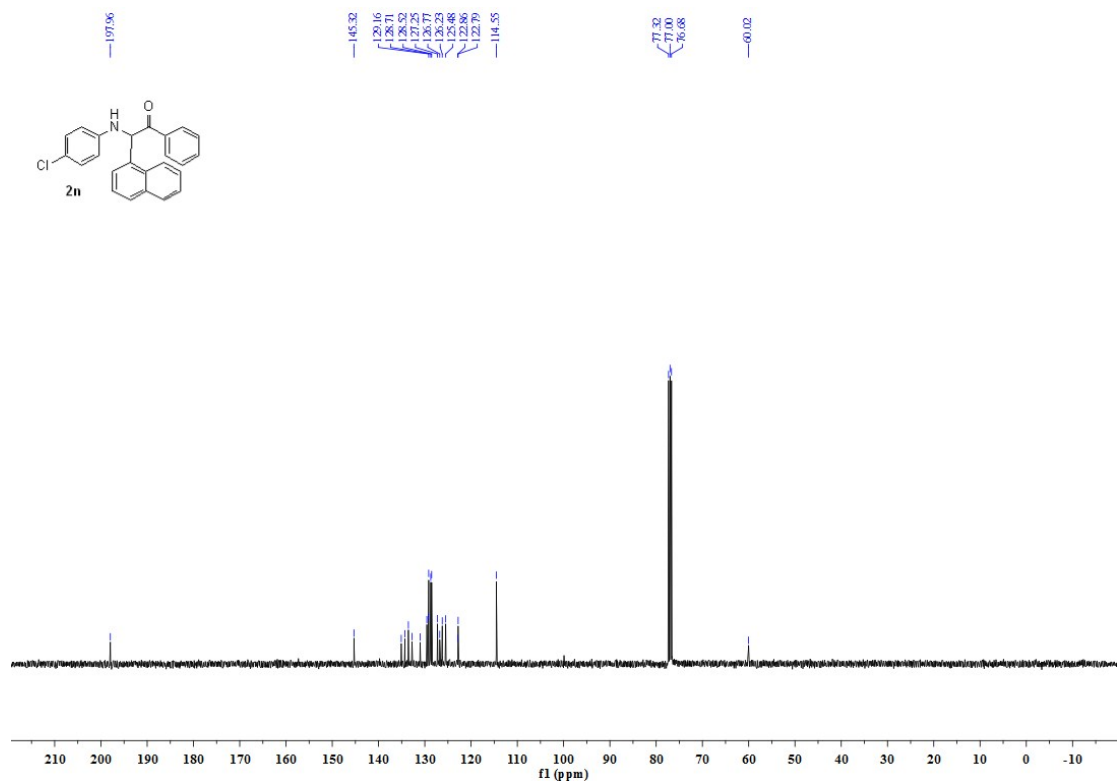

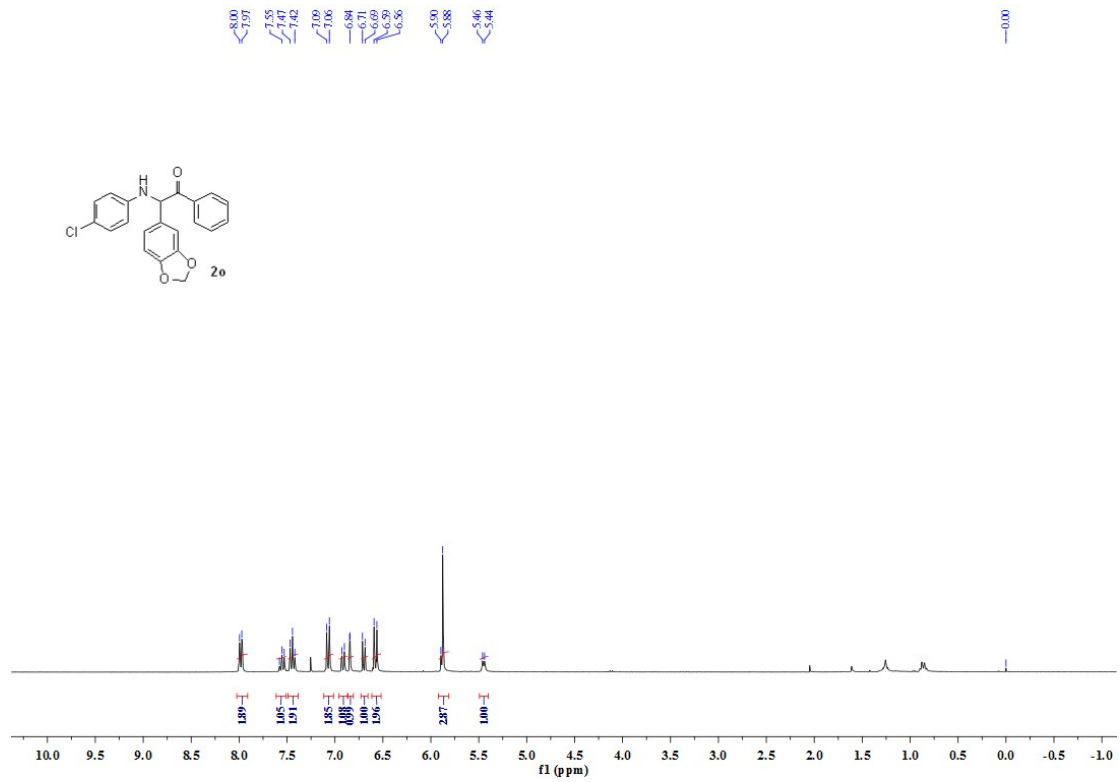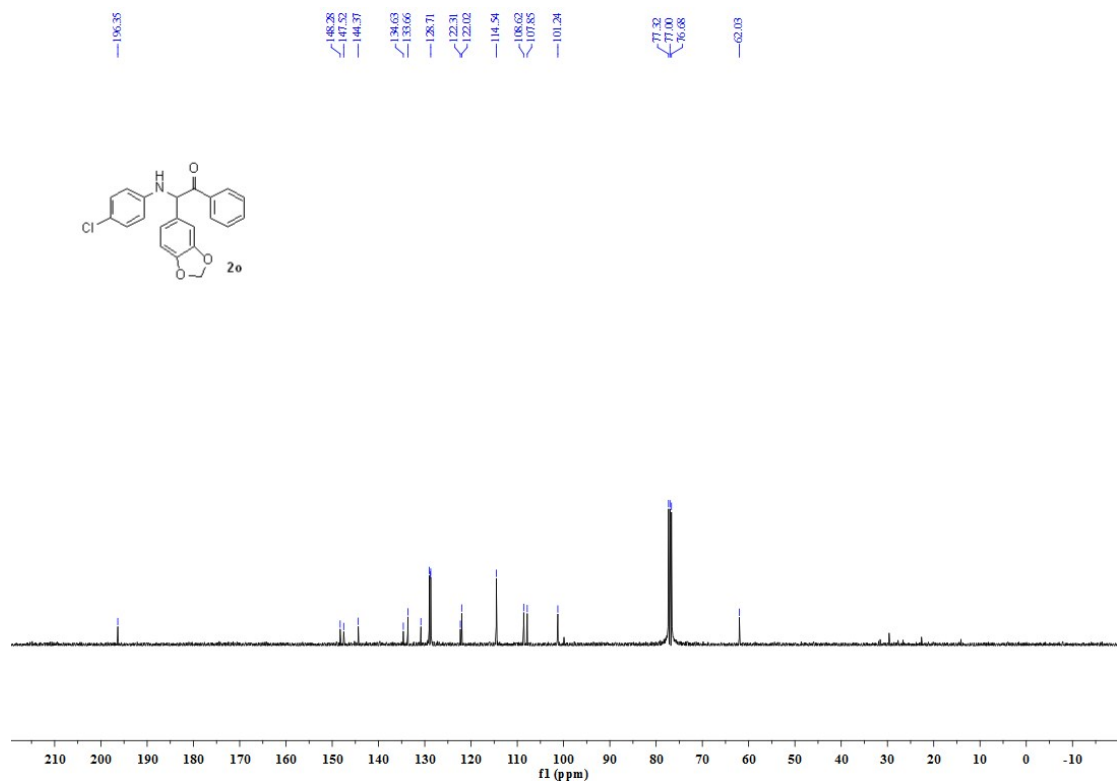

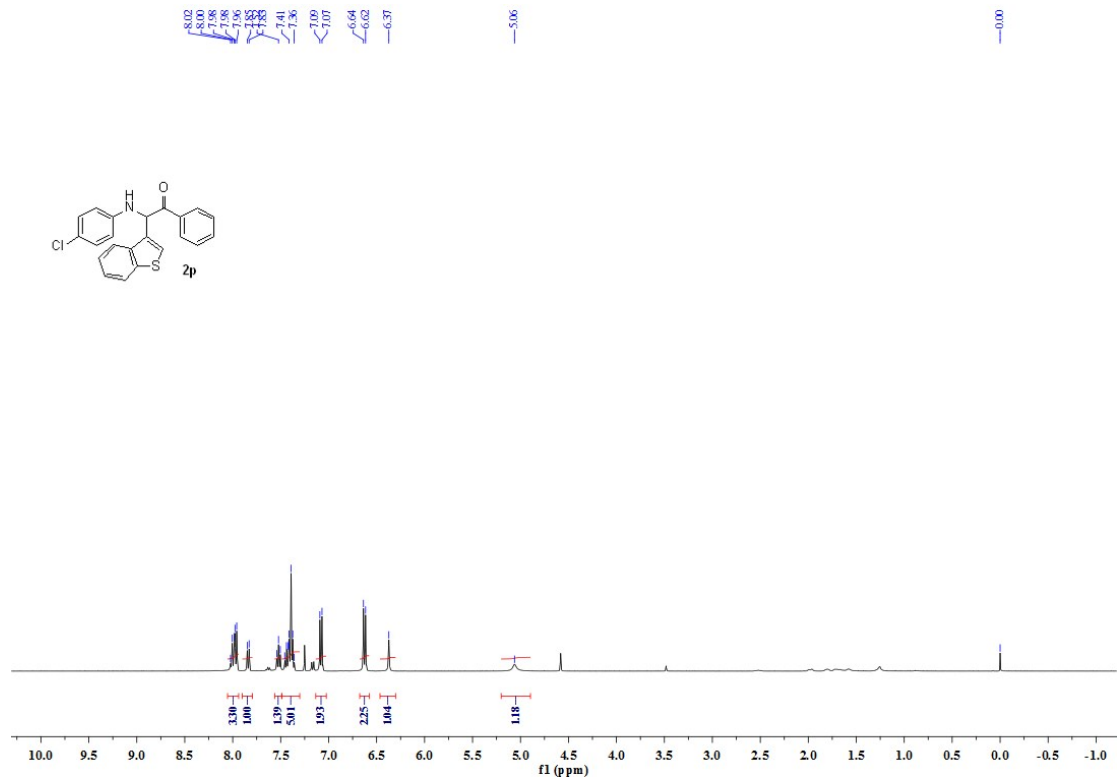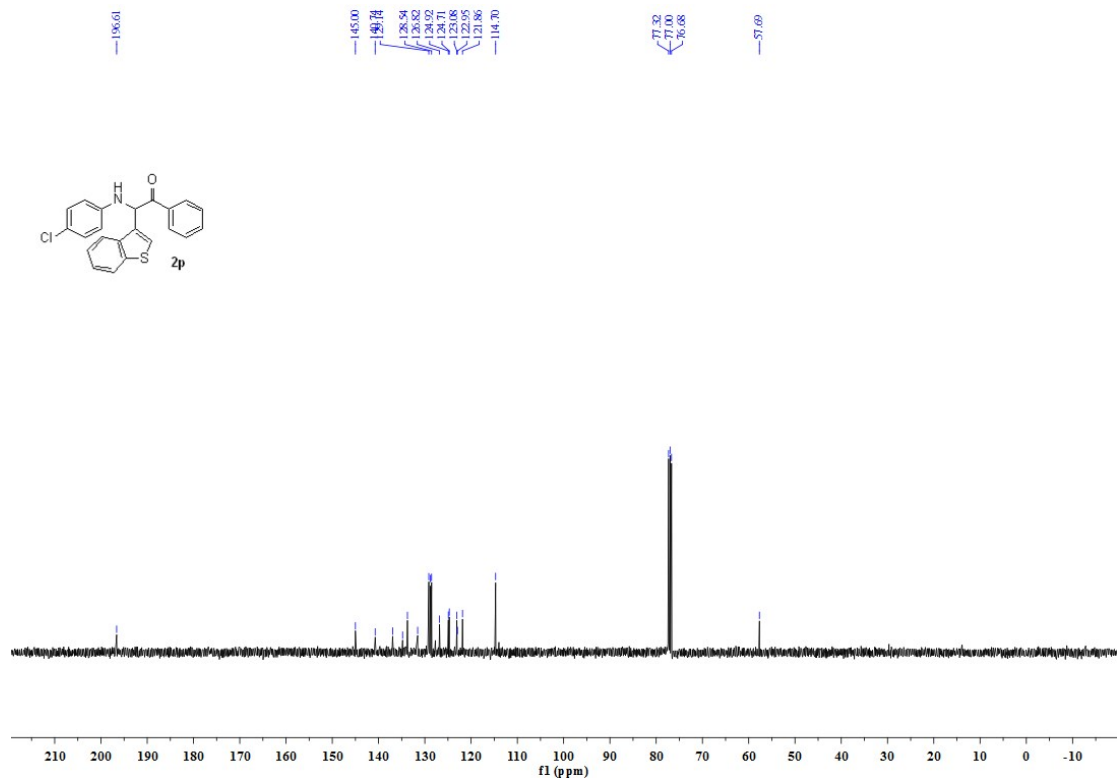

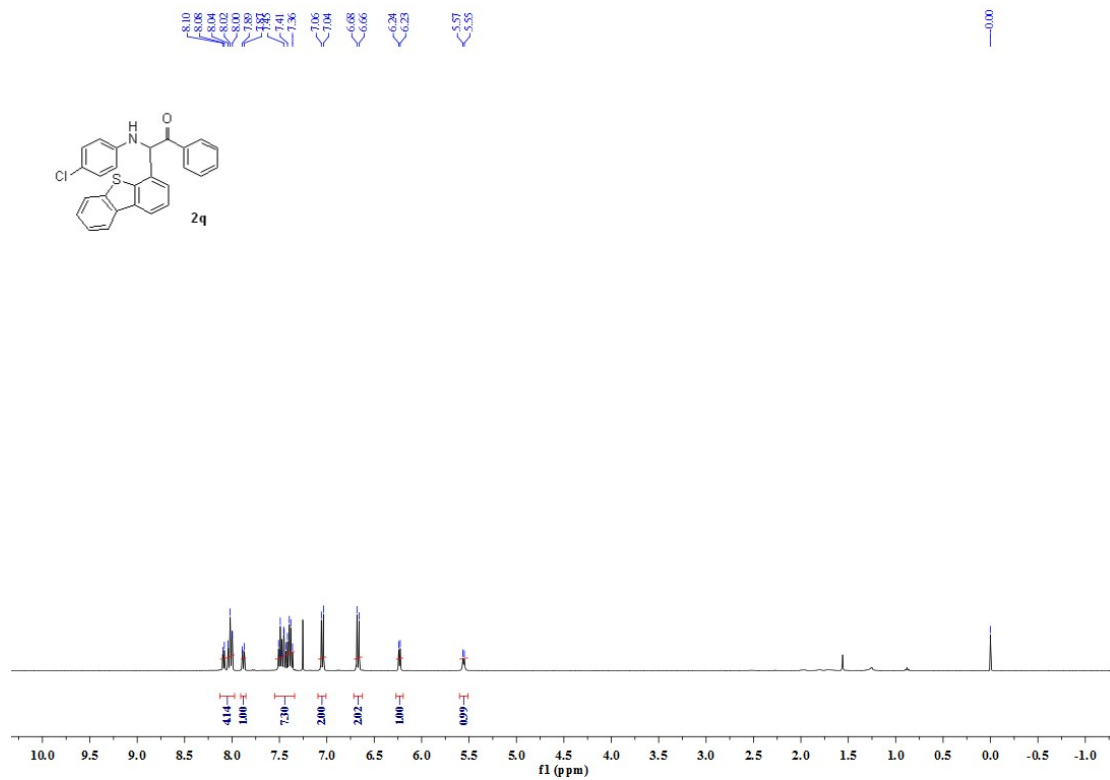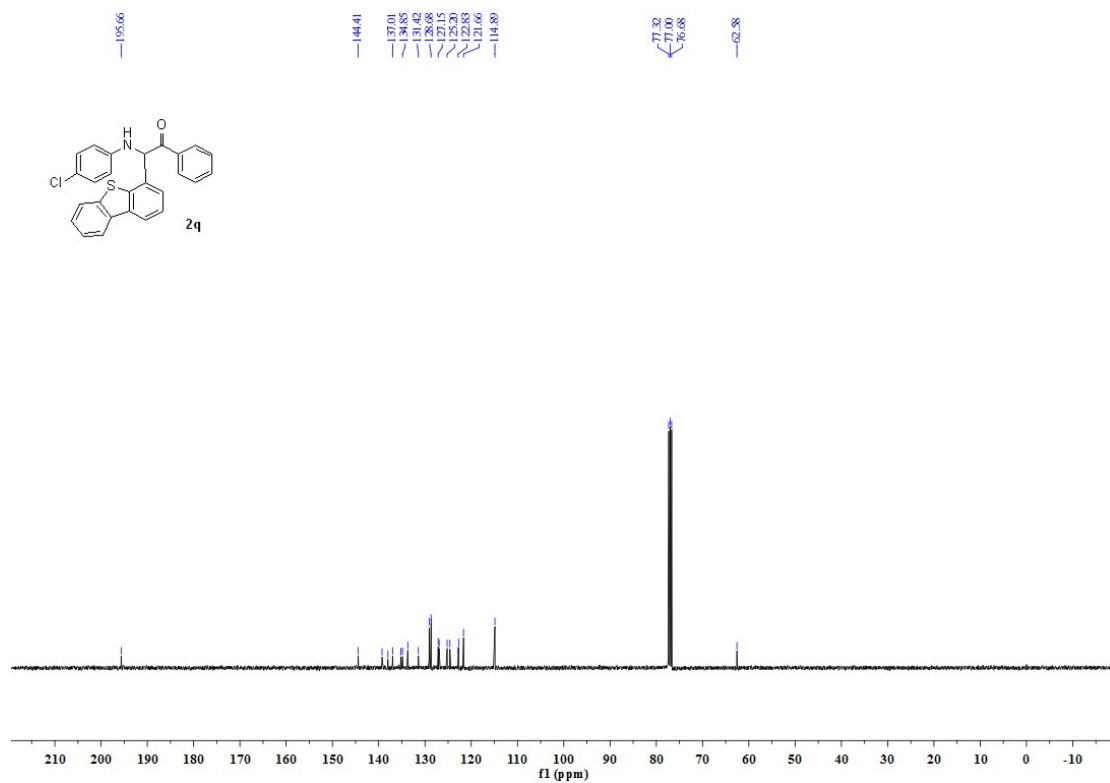

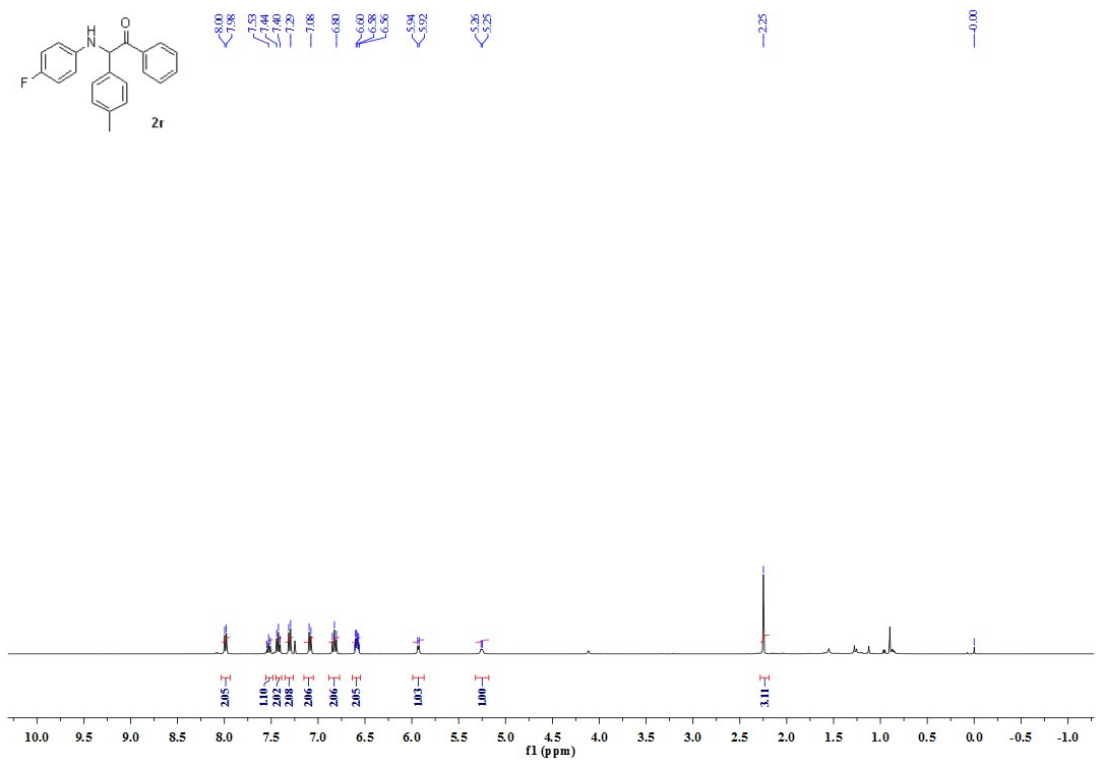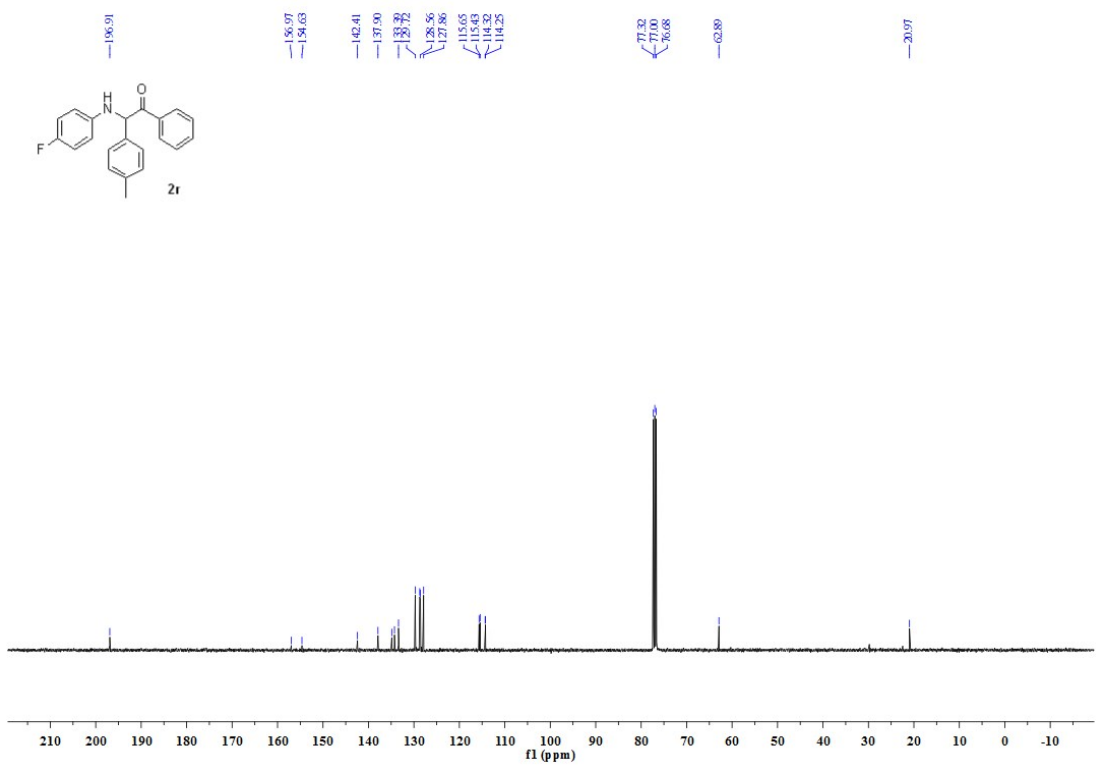

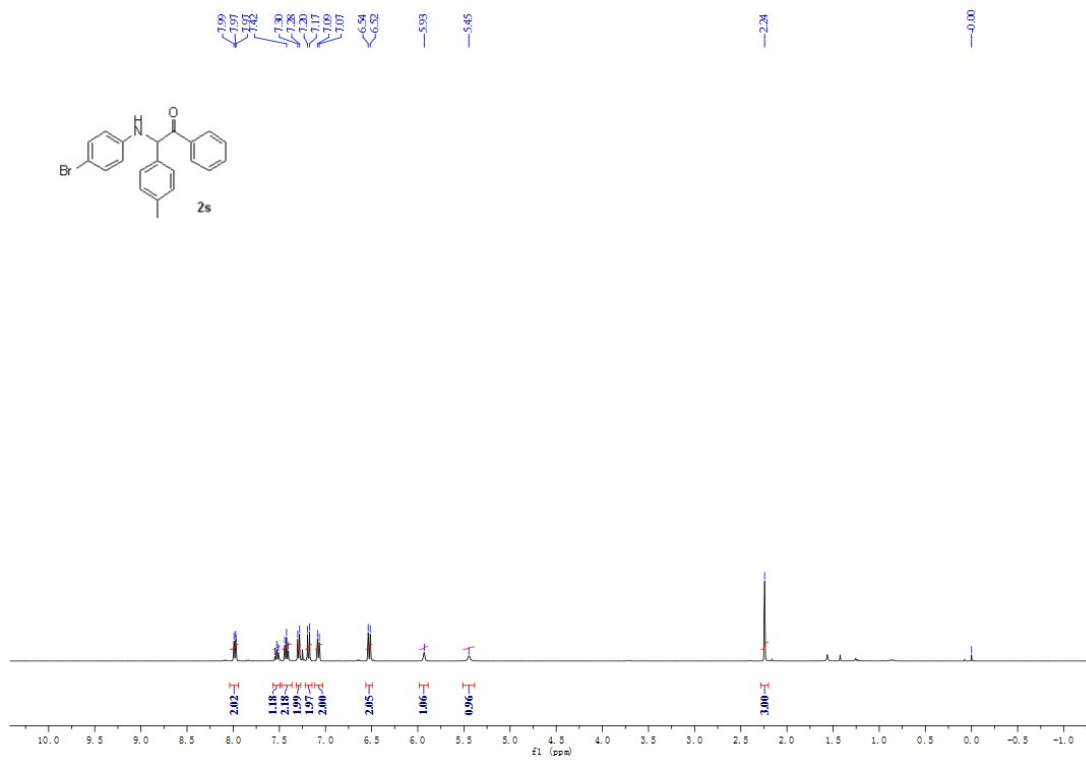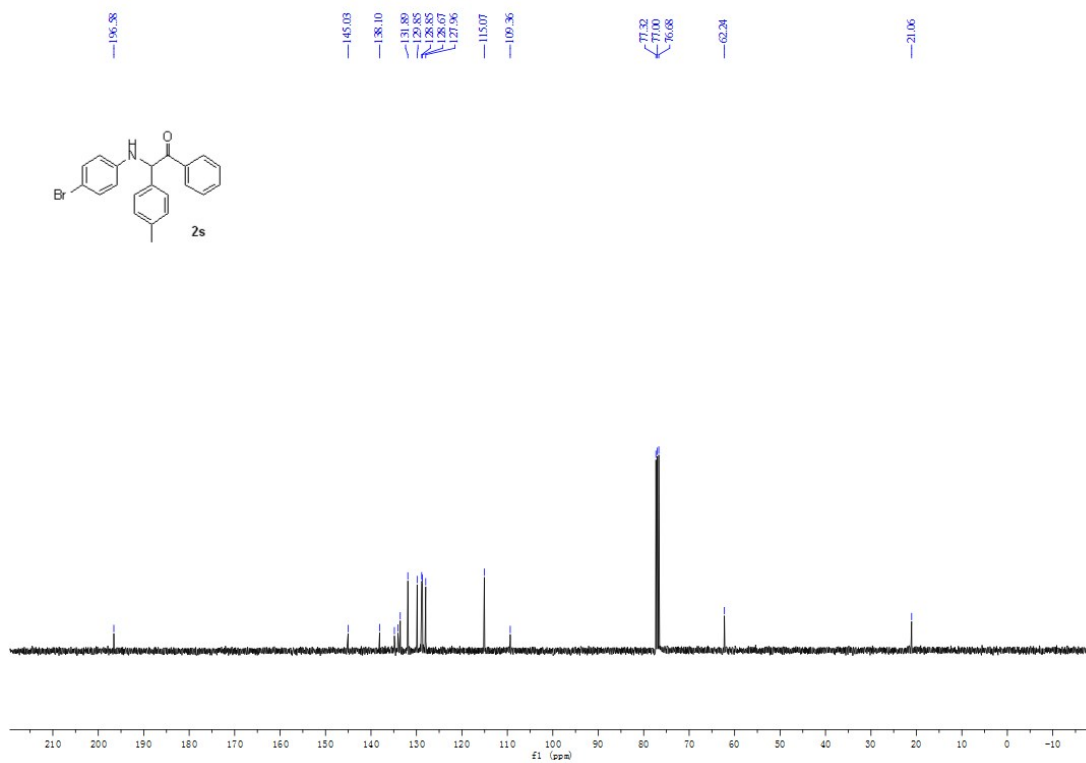

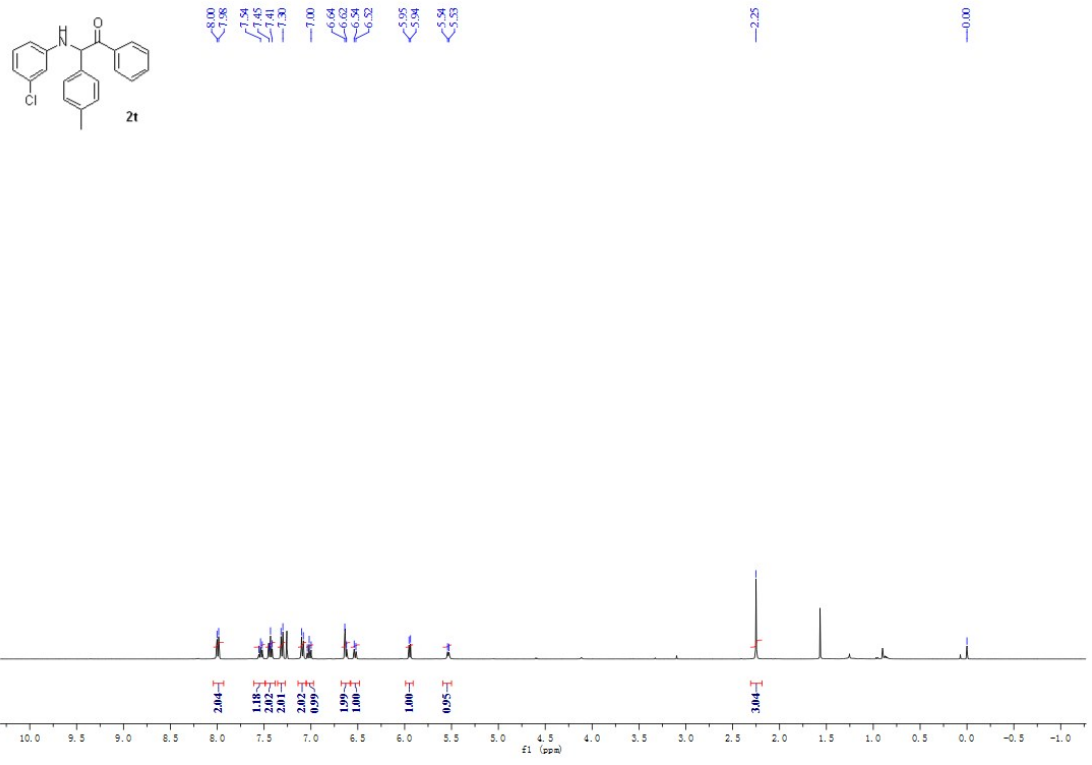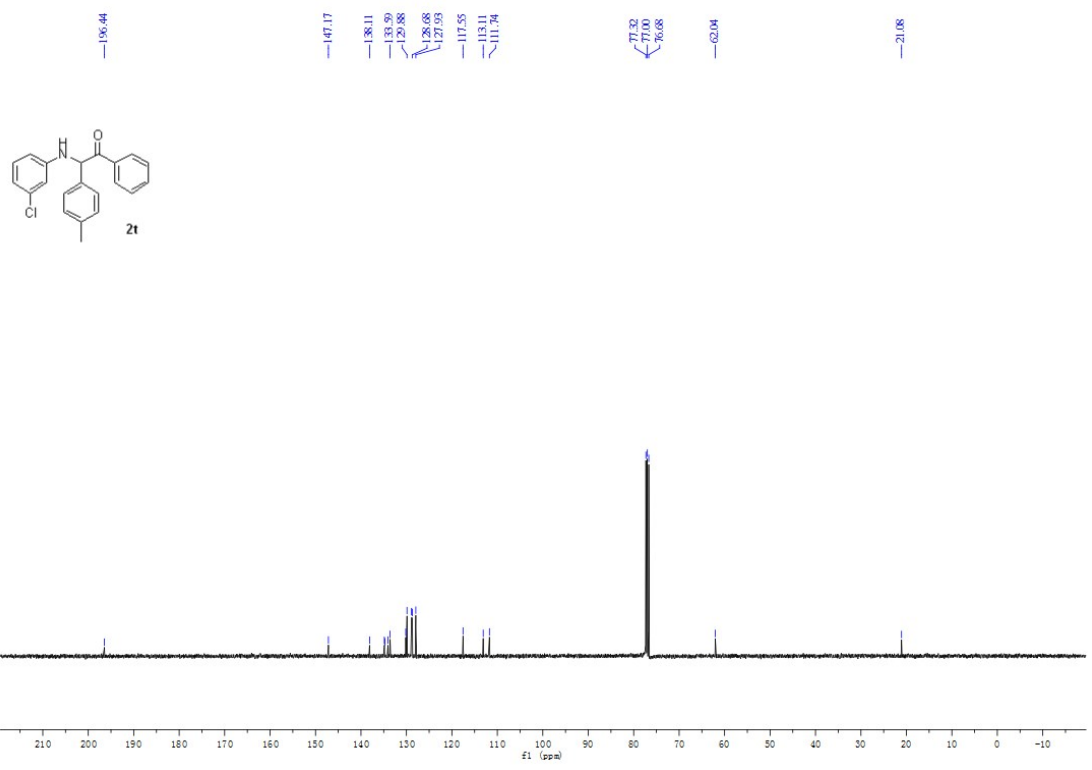

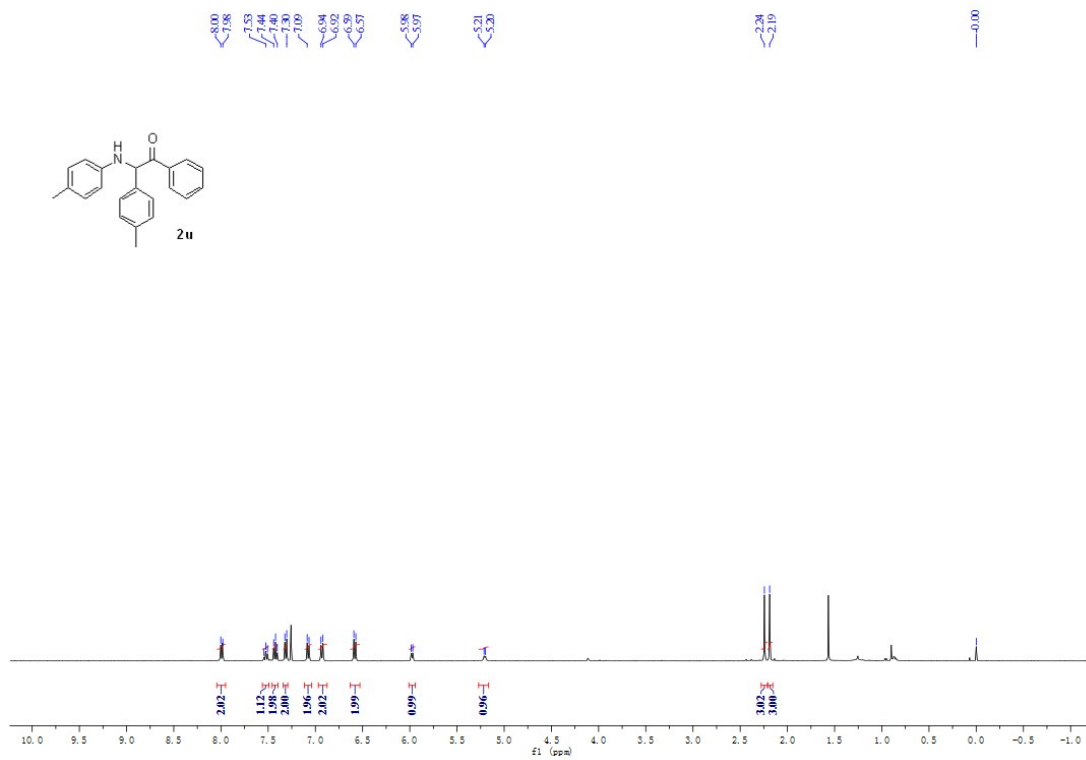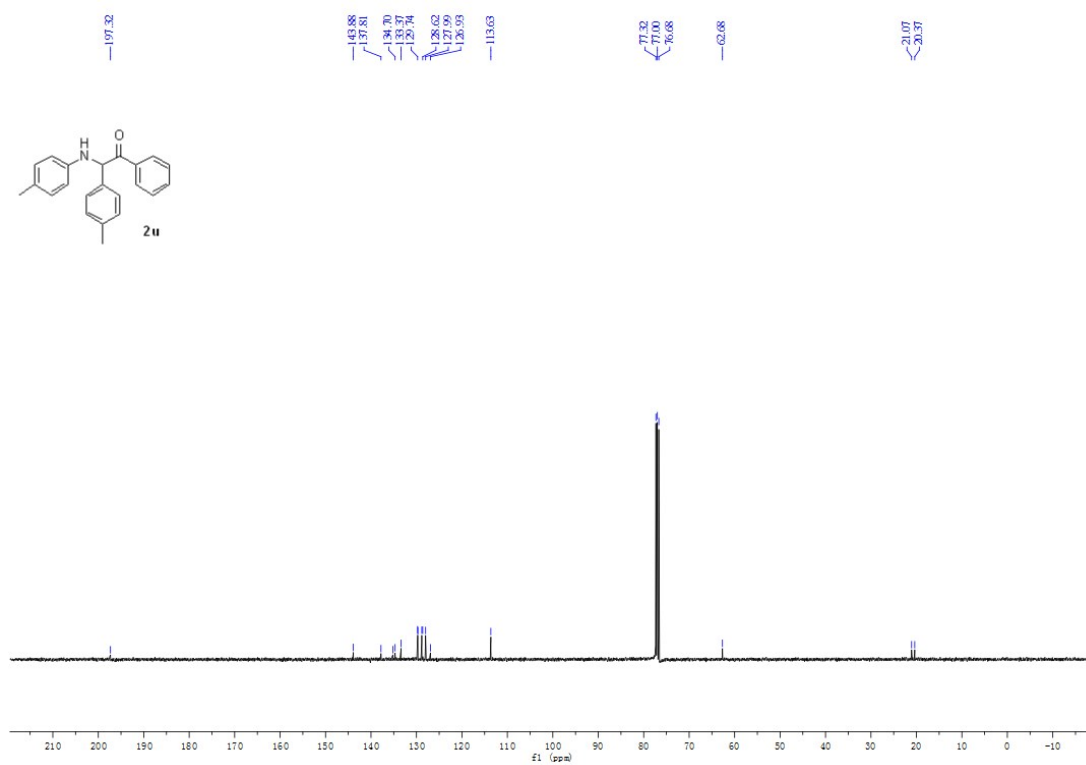



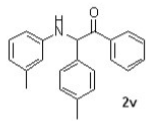

8.01  
 7.99  
 7.52  
 7.44  
 7.40  
 7.31  
 7.09  
 6.99  
 6.51  
 6.49  
 6.47  
 6.45  
 5.99  
 5.33  
 2.24  
 2.23  
 0.00

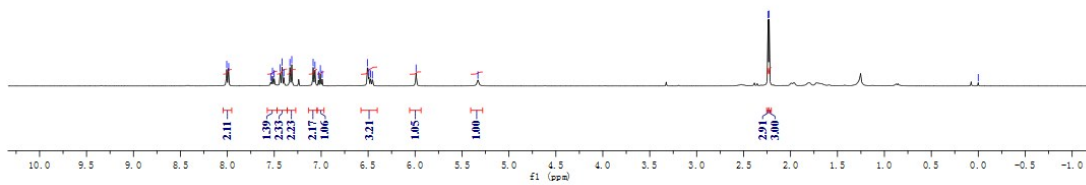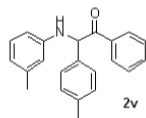

197.11  
 146.11  
 138.90  
 137.76  
 133.78  
 133.78  
 128.38  
 127.93  
 118.64  
 114.34  
 110.30  
 77.32  
 77.00  
 76.68  
 62.26  
 29.63  
 21.88  
 21.04

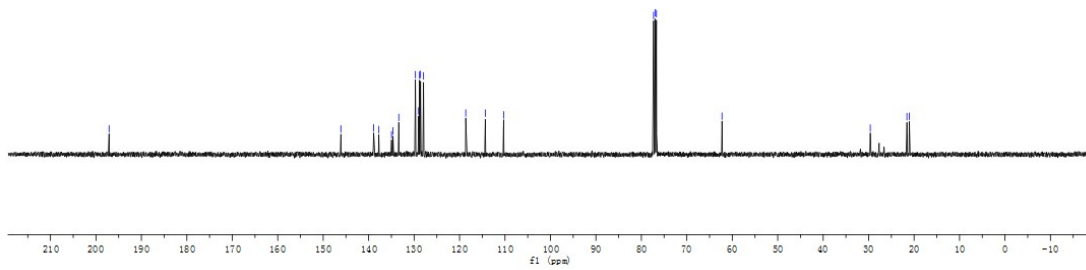

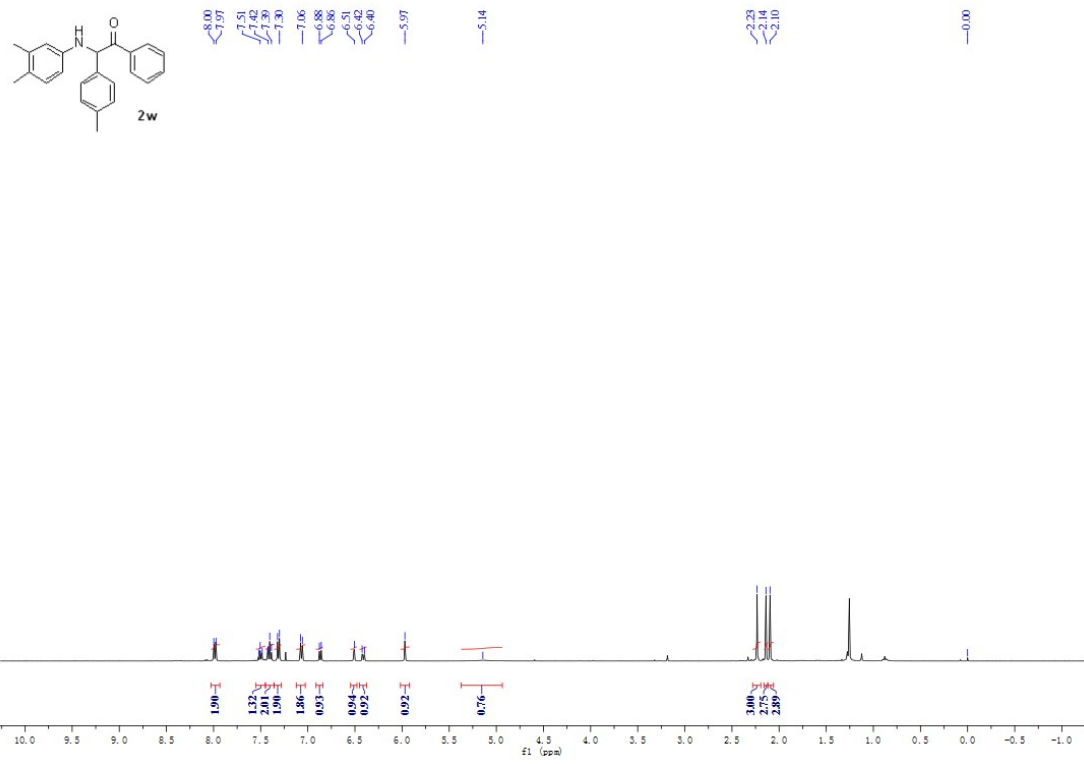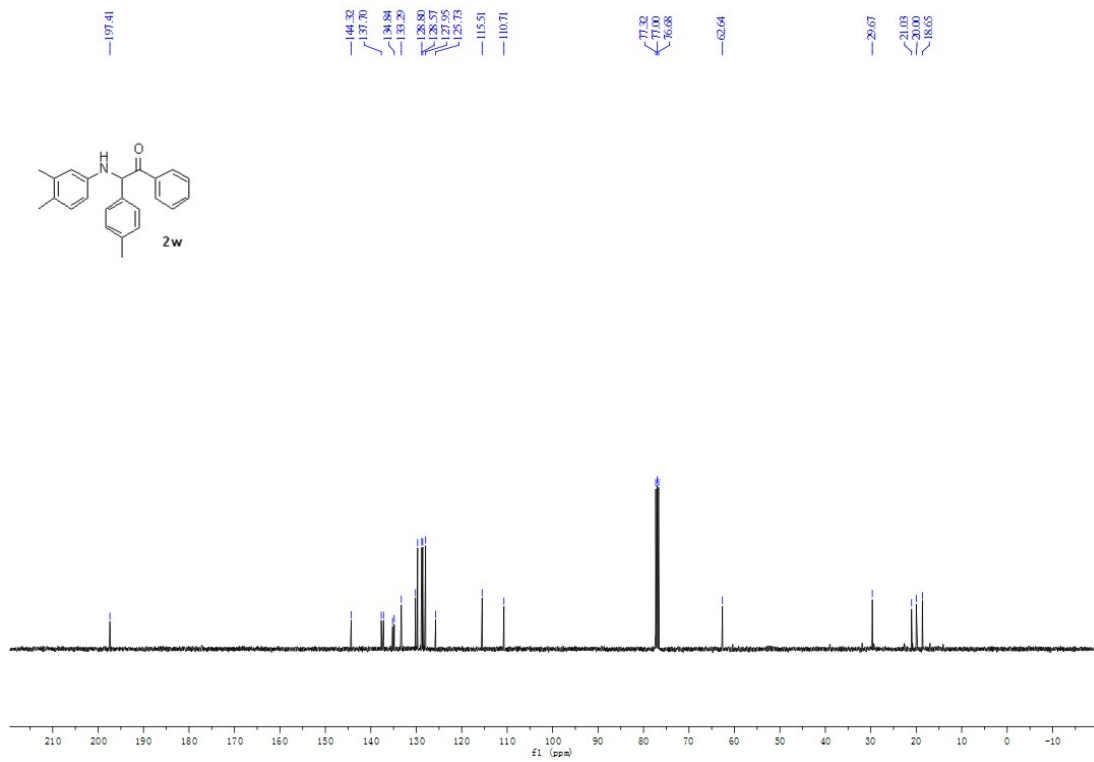

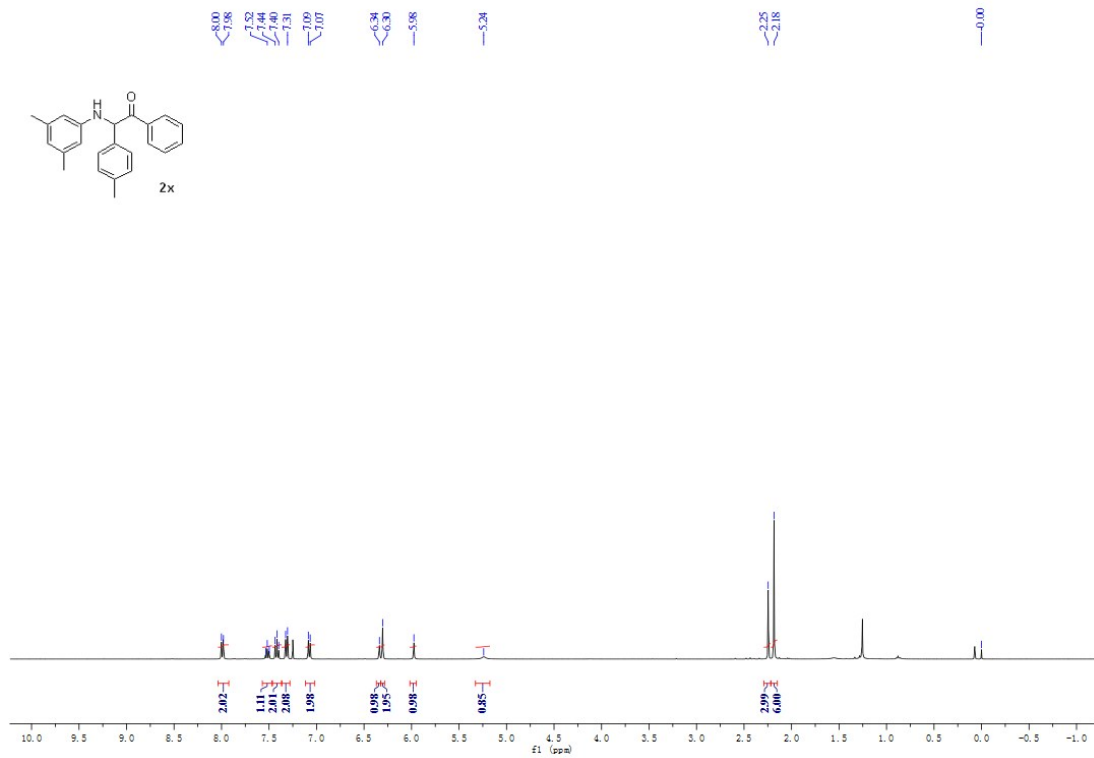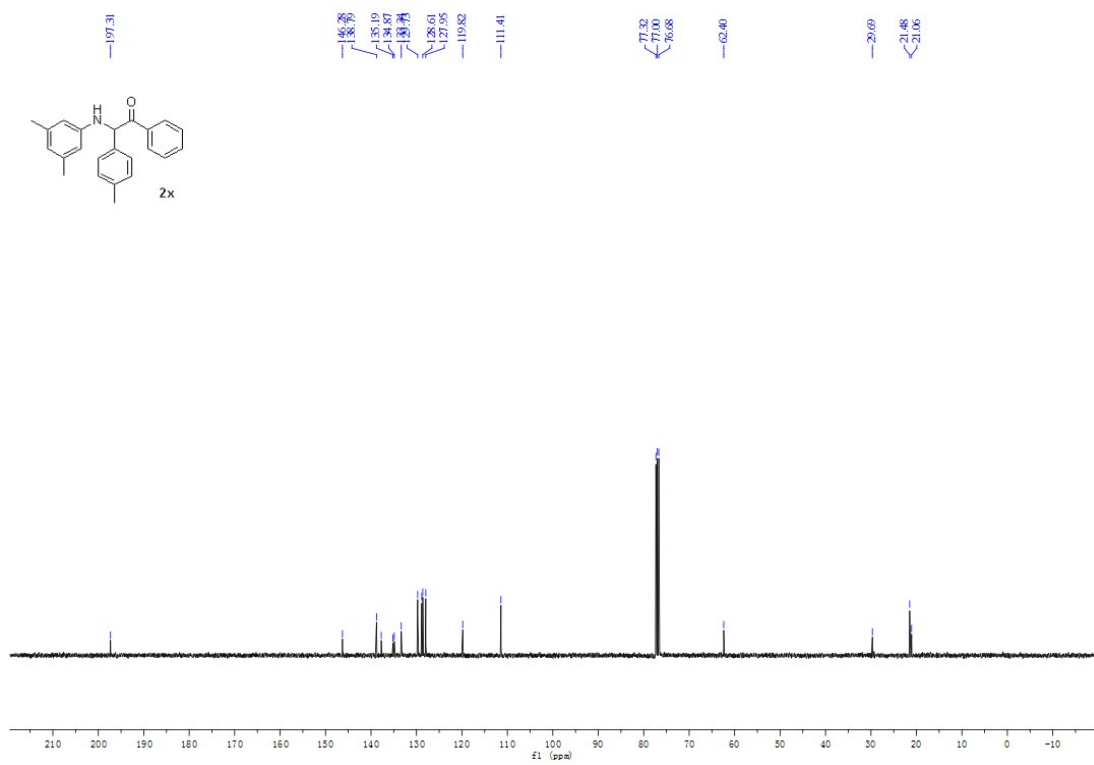

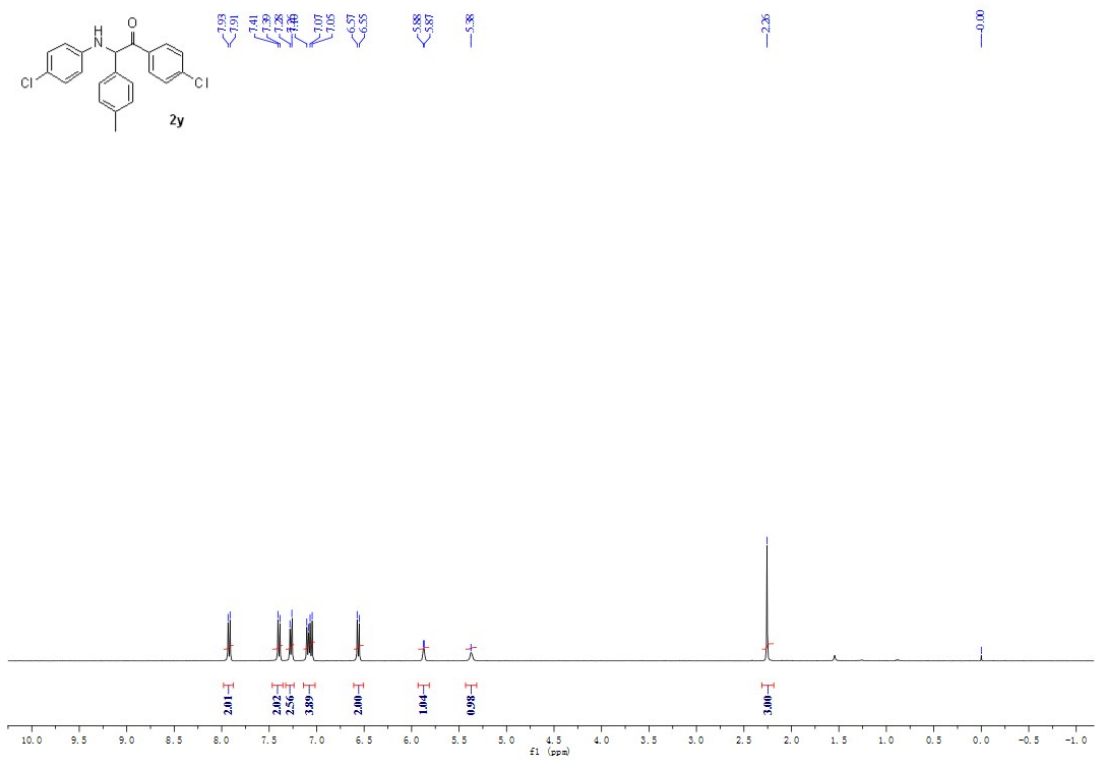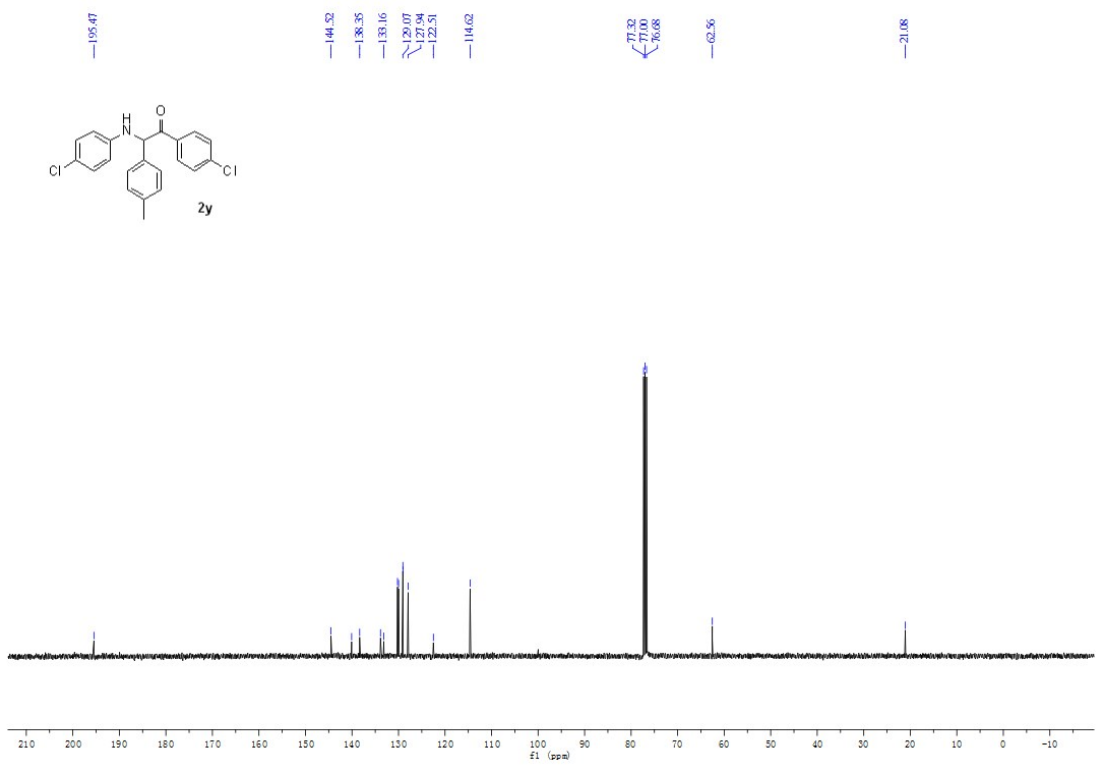

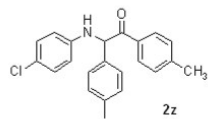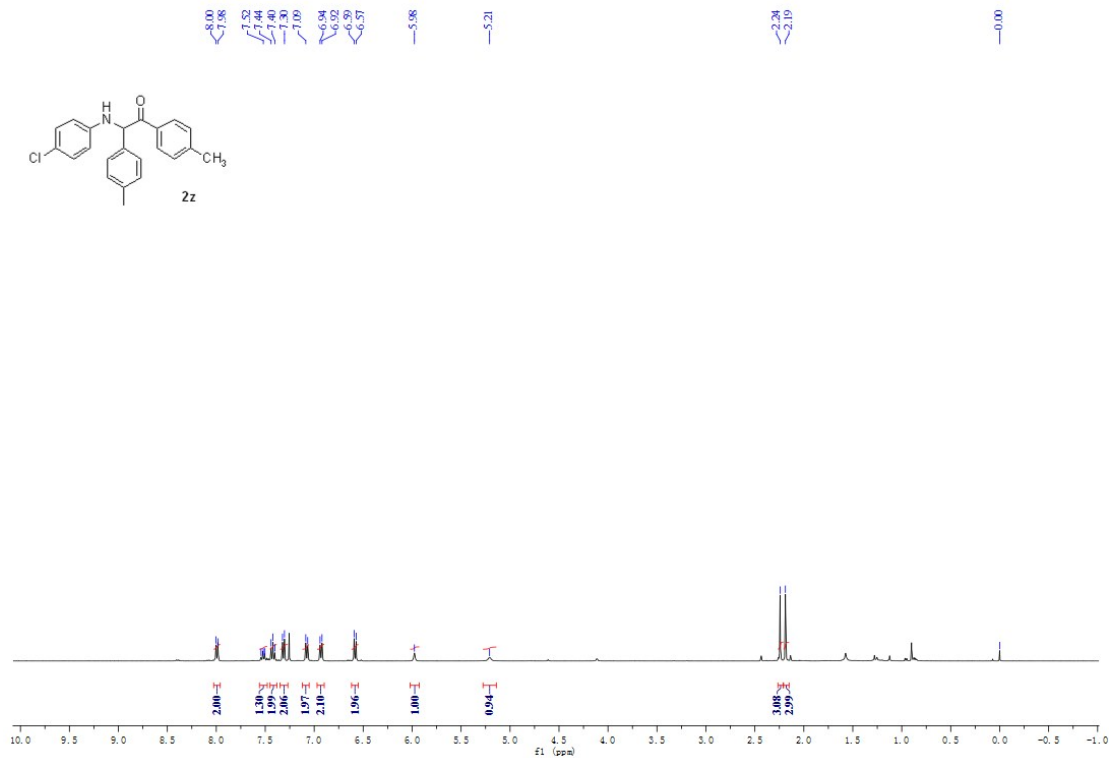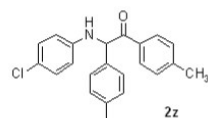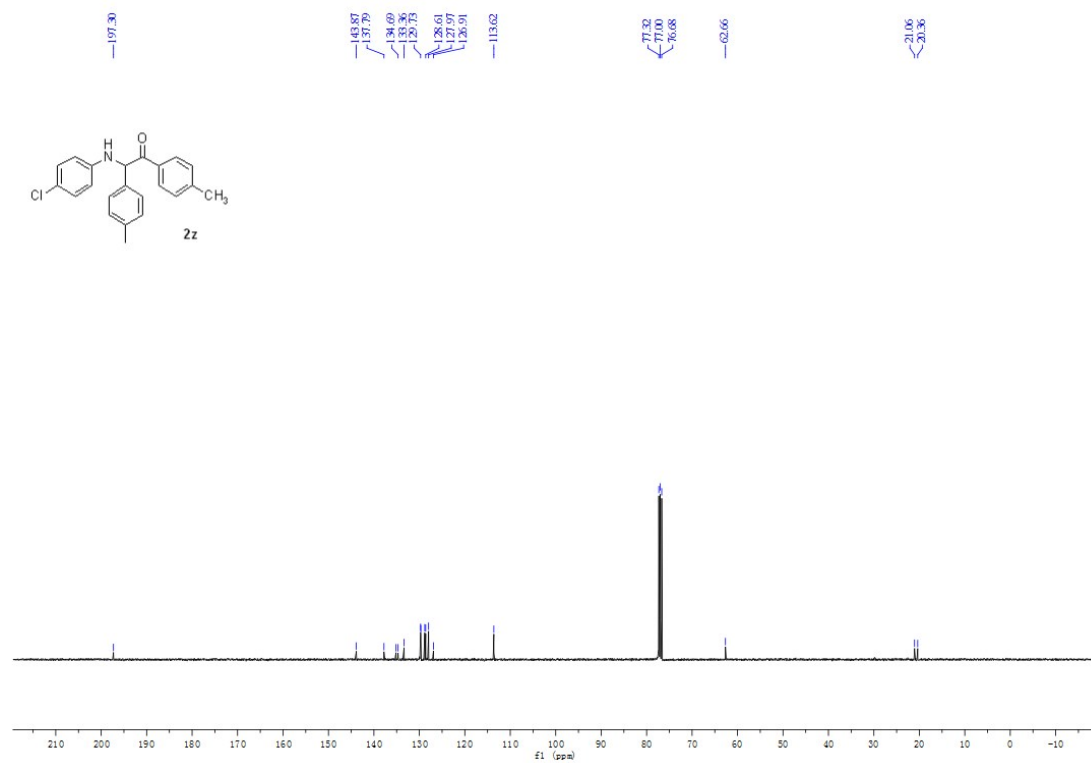

Supplement: c9ra06108h1.pdf [file c9ra06108h1.pdf]
